1           **The *C. elegans* SMOC-1 protein acts cell non-autonomously to promote bone**  
2                                           **morphogenetic protein signaling**  
3           Melisa S. DeGroot, Herong Shi, Alice Eastman, Alexandra N. McKillop, Jun Liu  
4           Department of Molecular Biology and Genetics, Cornell University, Ithaca, NY 14853

- 5 **Running Title:** SMOC-1 promotes BMP signaling
- 6 **Key words:** BMP, SMOC-1, SPARC, LON-2, glypican, body size
- 7 **Corresponding author:** Jun Liu, Department of Molecular Biology and Genetics, 439
- 8 Biotechnology Building, Cornell University, Ithaca, NY 14853.
- 9 Tel: 607-257-2863. Fax: 607-255-6249. Email: [JL53@cornell.edu](mailto:JL53@cornell.edu)

10 **ABSTRACT (219 words)**

11 Bone morphogenetic protein (BMP) signaling regulates many different developmental  
12 and homeostatic processes in metazoans. The BMP pathway is conserved in *Caenorhabditis*  
13 *elegans*, and is known to regulate body size and mesoderm development. We have identified the  
14 *C. elegans smoc-1* (Secreted MODular Calcium binding protein-1) gene as a new player in the  
15 BMP pathway. *smoc-1(0)* null mutants have a small body size, while overexpression of *smoc-1*  
16 led to a long body size and increased expression of the RAD-SMAD BMP reporter, suggesting  
17 that SMOC-1 acts as a positive modulator of BMP signaling. Using double mutant analysis, we  
18 showed that SMOC-1 antagonizes the function of the glypican LON-2 and acts through the BMP  
19 ligand DBL-1 to regulate BMP signaling. Moreover, SMOC-1 appears to specifically regulate  
20 BMP signaling without significant involvement in a TGF $\beta$ -like pathway that regulates dauer  
21 development. We found that *smoc-1* is expressed in multiple tissues, including cells of the  
22 pharynx, intestine, and posterior hypodermis, and that the expression of *smoc-1* in the intestine is  
23 positively regulated by BMP signaling. We further established that SMOC-1 functions cell non-  
24 autonomously to regulate body size. Human SMOC1 and SMOC2 can each partially rescue the  
25 *smoc-1(0)* mutant phenotype, suggesting that SMOC-1's function in modulating BMP signaling  
26 is evolutionarily conserved. Together, our findings highlight a conserved role of SMOC proteins  
27 in modulating BMP signaling in metazoans.

28 **ARTICLE SUMMARY (100 words)**

29 BMP signaling is critical for development and homeostasis in metazoans, and is under tight  
30 regulation. We report the identification and characterization of a Secreted MODular Calcium  
31 binding protein SMOC-1 as a positive modulator of BMP signaling in *C. elegans*. We  
32 established that SMOC-1 antagonizes the function of LON-2/glypican and acts through the DBL-  
33 1/BMP ligand to promote BMP signaling. We identified *smoc-1*-expressing cells, and  
34 demonstrated that SMOC-1 acts cell non-autonomously and in a positive feedback loop to  
35 regulate BMP signaling. We also provide evidence suggesting that the function of SMOC  
36 proteins in the BMP pathway is conserved from worms to humans.

## 37 INTRODUCTION

38

39 Bone morphogenetic proteins (BMPs) are highly conserved signaling molecules that  
40 mediate cell-cell communication. The BMP signaling cascade is initiated when the BMP ligands  
41 bind to the membrane-bound receptor kinases, upon which the type-II receptor phosphorylates  
42 the type-I receptors. The signaling cascade is then transduced within the receiving cell as the  
43 receptor-associated Smads (R-Smads) are activated via phosphorylation by the type-I receptor.  
44 Activated R-Smads complex together with common mediator Smads (co-Smads) and other  
45 transcription factors to regulate transcription of downstream genes (KATAGIRI AND WATABE  
46 2016). BMPs regulate fundamental cellular processes, including cell migration, cell proliferation,  
47 cell fate specification, and cell death throughout metazoan development (WANG *et al.* 2014).  
48 Tight regulation of BMP signaling in time, space, magnitude, and duration is therefore important  
49 for proper developmental outcomes. Mis-regulation of BMP signaling can cause a variety of  
50 disorders in humans (BRAZIL *et al.* 2015; SALAZAR *et al.* 2016; WU *et al.* 2016) . Previous  
51 studies have demonstrated that BMP signaling can be regulated at many levels, both  
52 extracellularly and intracellularly (BRAGDON *et al.* 2011; LOWERY *et al.* 2016; SEDLMEIER AND  
53 SLEEMAN 2017). The nematode *C. elegans* provides a useful system for identifying factors that  
54 modulate the BMP pathway.

55 The BMP pathway in *C. elegans* is comprised of evolutionarily conserved core  
56 components including the ligand (DBL-1/BMP), the type I and type II receptors (SMA-6/RI and  
57 DAF-4/RII), the R-Smads (SMA-2 and SMA-3), and the co-Smad (SMA-4) (ESTEVEZ *et al.*  
58 1993; SAVAGE *et al.* 1996; KRISHNA *et al.* 1999; MORITA *et al.* 1999; SUZUKI *et al.* 1999;  
59 MORITA *et al.* 2002) (Figure 1A). Unlike in *Drosophila* and vertebrates, BMP signaling is not

60 essential for viability in *C. elegans*, yet it regulates multiple processes, including body size, male  
61 tail development, and mesoderm patterning (GUMIENNY AND SAVAGE-DUNN 2013; SAVAGE-  
62 DUNN AND PADGETT 2017). The BMP ligand DBL-1 is expressed in the ventral nerve cord  
63 (SUZUKI *et al.* 1999), and it activates the pathway in the hypodermis to regulate body size  
64 (YOSHIDA *et al.* 2001; WANG *et al.* 2002). Reduced BMP signaling causes a small (Sma) body  
65 size, while increased BMP signaling leads to a long (Lon) body size (MORITA *et al.* 1999;  
66 SUZUKI *et al.* 1999; MORITA *et al.* 2002). BMP signaling also regulates the development of the  
67 postembryonic mesoderm lineage, the M lineage. We have shown that mutations in the BMP  
68 pathway specifically suppress the M lineage dorsoventral patterning defects caused by mutations  
69 in *sma-9*, which encodes the *C. elegans* zinc finger protein Schnurri (LIANG *et al.* 2003; FOEHR  
70 *et al.* 2006). Specifically, mutations in *sma-9* result in the loss of the two M-derived  
71 coelomocytes (CCs), while BMP pathway mutations can restore these two CCs in the *sma-9(0)*  
72 mutant background (FOEHR *et al.* 2006; LIU *et al.* 2015; WANG *et al.* 2017) (Figure 1B,C). Using  
73 this suppression of *sma-9(0)* M-lineage defect (Susm) assay, we have identified multiple  
74 evolutionarily conserved modulators of BMP signaling. These include the RGM protein DRAG-  
75 1 (TIAN *et al.* 2010), the neogenin homolog UNC-40 (TIAN *et al.* 2013), the ADAM10 protein  
76 SUP-17 (WANG *et al.* 2017), and three tetraspanins, TSP-21, TSP-12 and TSP-14 (LIU *et al.*  
77 2015; WANG *et al.* 2017).

78 In this study, we report the identification and characterization of a new BMP modulator,  
79 which we have named SMOC-1. SMOC-1 is predicted to be a secreted protein that contains a  
80 thyroglobulin-like (TY) domain and an extracellular calcium-binding (EC) motif. We show here  
81 that SMOC-1 acts as a positive modulator of BMP signaling in *C. elegans*. We further  
82 demonstrate that SMOC-1 acts upstream of the ligand to regulate body size. We identified *smoc-*

83 *l*-expressing cells, and demonstrated that SMOC-1 acts cell non-autonomously to regulate BMP  
84 signaling. Finally, we provide evidence that the function of SMOC proteins in the BMP pathway  
85 is conserved from worms to humans.

86

## 87 **MATERIALS & METHODS**

88

### 89 ***C. elegans* strains**

90 All strains were maintained at 20°C using standard culture conditions (BRENNER 1974)  
91 unless otherwise specified. Table 1 lists all the strains used in this study.

92

### 93 **Plasmid constructs and transgenic lines**

94 All plasmid constructs used in this study are listed in Table 2. The *smoc-1* open reading  
95 frame was amplified from the Vidal RNAi library (RUAL *et al.* 2004). Subsequent sequencing of  
96 the clone revealed the presence of a point mutation (S103P, Figure 2D), changing amino acid  
97 103 from serine (TCC) to proline (CCC). Site directed mutagenesis was used to fix this point  
98 mutation. Plasmids containing the human *SMOC1* and *SMOC2* cDNAs were purchased from  
99 PlasmID, the DNA resource core at Harvard Medical School.

100 Transgenic strains were generated using the plasmid pRF4 (*rol-6(su1006)*), pCFJ90 (*myo-*  
101 *2p::mCherry::unc-54 3' UTR*), or pJKL724 (*myo-3p::mCherry::unc-54 3' UTR*) as a co-injection  
102 marker. Two transgenic lines with the best transmission efficiency were analyzed for each  
103 plasmid of interest. Integrated transgenic lines either overexpressing *smoc-1* (*jjIs5119*) or  
104 carrying the *smoc-1* transcriptional reporter (*jjIs4688* and *jjIs4694*) were generated using  
105 gamma-irradiation, followed by three rounds of outcrossing with N2 worms.

106

## 107 **Protein sequence alignment**

108 Sequences were taken from Genbank (*C. elegans* SMOC-1 (T04F3.2), 179609; *C.*  
109 *remanei* CRE\_26999, 9815068; *C. briggsae* CBG23276, 8578577; *D. melanogaster* Pent/Magu,  
110 44850; *H. sapiens* SMOC1, 64093; *H. sapiens* SMOC2, 64094) or Wormbase (*C. brenneri*  
111 CBN20462; *C. japonica* CJA07338; *P. pacificus* PPA34808). TY and EC domains in SMOC  
112 proteins were predicted by Interpro (FINN *et al.* 2017). Domains were aligned using M-COFFEE  
113 Multiple Sequence Alignment (MSA) tool on the T-COFFEE server (version 11.00.d625267,  
114 (WALLACE *et al.* 2006)). ALN files were processed to produce alignment images using  
115 BOXSHADE.

116

## 117 **Microscopy**

118 Epifluorescence and differential interference contrast (DIC) microscopy were conducted on  
119 a Leica DMRA2 compound microscope equipped with a Hamamatsu Orca-ER camera using the  
120 iVision software (Biovision Technology, Inc.). Subsequent image analysis was performed using  
121 Fiji (SCHINDELIN *et al.* 2012). RAD-SMAD reporter assay was carried out as previously  
122 described (TIAN *et al.* 2013).

123

## 124 **Body size measurements**

125 Body size measurement assays were conducted as previously described (TIAN *et al.* 2013).  
126 Hermaphrodite worms were imaged at the L4.3 stage based on vulva development (MOK *et al.*  
127 2015). Body sizes were measured from images using the segmented line tool of Fiji. An



128 ANOVA and a Tukey HSD were conducted to test for differences in body size between  
129 genotypes using R (R CORE TEAM 2015).

130

### 131 **Suppression of *sma-9(0)* M-lineage defect (Susm) assay**

132 For the Susm assay, worms were grown at 20°C and then the number of animals with 4  
133 CCs and 6 CCs were tallied across three to seven plates for each genotype. For the Susm rescue  
134 experiments, we generated general linear models (GLMs) with binomial errors, and a logit link  
135 function designating transgene as the explanatory function to test for differences between  
136 transgenic and non-transgenic groups within a line.

137

### 138 **Dauer formation assay**

139 Dauer formation assay was conducted under non-dauer-inducing conditions as previously  
140 described (VOWELS AND THOMAS 1992). Ten adult hermaphrodites were placed on a six  
141 centimeter NGM plate (five plates per strain at each temperature) and allowed to lay eggs for less  
142 than eight hours. Adults were removed and plates were placed at the test temperature. When non-  
143 dauer worms became young adults, the numbers of dauer and non-dauer worms on each plate  
144 were scored. Using R, we tested for differences in dauer formation between genotypes using an  
145 ANOVA followed by a TukeyHSD.

146

### 147 **Data availability statement**

148 Strains and plasmids are available upon request. The authors affirm that all data  
149 necessary for confirming the conclusions of the article are present within the article, figures, and  
150 tables.

151 **RESULTS**

152

153 **Mutations in T04F3.2 suppress the mesoderm defects of *sma-9(0)* mutants**

154 In a previous *sma-9* suppressor screen, we uncovered a novel complementation group  
155 named *susm-1* that includes three alleles, *jj65*, *jj85* and *jj180* (LIU *et al.* 2015) (Table 3), which  
156 suppressed the *sma-9(0)* M lineage defect at high penetrance. Whole genome sequencing (WGS)  
157 of the three alleles identified molecular lesions in the uncharacterized gene T04F3.2: *jj65* and  
158 *jj85* are missense mutations C210Y and E105K, respectively, while *jj180* is a nonsense mutation  
159 Q180Stop (Figure 2A,B). To confirm that T04F3.2 is the corresponding gene for this  
160 complementation group, we obtained two deletion alleles that delete most of the coding region of  
161 T04F3.2, *tm7000* and *tm7125* (Figure 2A), and found that both alleles suppressed the *sma-9(0)*  
162 M lineage defect to near 100% (Table 3, Figure 1C). Pairwise complementation tests between  
163 *tm7000* and *jj65*, *jj85* or *jj180*, showed that *tm7000* failed to complement all three alleles in their  
164 suppression of the *sma-9(0)* M lineage defect (Table 3). Subsequent *sma-9(0)* suppressor screens  
165 conducted in the lab identified three additional alleles of this complementation group, *jj109*,  
166 *jj115*, and *jj139*. WGS followed by Sanger sequencing showed that all three alleles contain  
167 nonsense mutations in T04F3.2: W13Stop for both *jj115* and *jj139*, and W176Stop for *jj109*  
168 (Figure 2A,B). Finally, a transgene containing the T04F3.2 genomic region including 2kb  
169 upstream sequences, the entire coding region with introns, and 2kb downstream sequences  
170 rescued the *sma-9(0)* suppression phenotype of *tm7125* mutants (Table 3). Collectively, these  
171 results demonstrated that T04F3.2 is the corresponding gene for the *susm-1* locus. The nature of  
172 the molecular lesions in *tm7000*, *tm7125*, *jj109*, *jj115*, *jj139*, and *jj180*, the near 100%  
173 penetrance of their *Susm* phenotypes, and their similar body size phenotypes (see below),

174 suggest that all of these alleles are null alleles. For ease of genotyping, most of our subsequent  
175 analysis was carried out using the *tm7125* allele.

176

### 177 **T04F3.2 encodes a predicted Secreted MODular Calcium-binding protein SMOC-1**

178 T04F3.2 is predicted to encode a protein of 260 amino acids. It contains a predicted signal  
179 peptide (SP), a thyroglobulin type I-like repeat (TY), and a secreted protein acidic and rich in  
180 cysteine (SPARC) extracellular calcium (EC) binding region (Figure 2). The EC domain is  
181 predicted to contain a pair of helix-loop-helix EF hand calcium-binding motifs (HOHENESTER *et*  
182 *al.* 1996; VANNAHME *et al.* 2002). The predicted T04F3.2 protein is most similar to the human  
183 secreted modular calcium-binding proteins SMOC1 and SMOC2 (VANNAHME *et al.* 2002;  
184 VANNAHME *et al.* 2003), and the *Drosophila melanogaster* SMOC homolog Pentagone/Magu  
185 (VUILLEUMIER *et al.* 2010). A BLAST search against the *C. elegans* genome showed that  
186 T04F3.2 is the only SMOC homolog. We have, therefore, named this gene *smoc-1* and its  
187 corresponding protein SMOC-1.

188 SMOC proteins are matricellular proteins that are in the same family as SPARC/BM-  
189 40/osteonectin (BRADSHAW 2012). The domain arrangement of SMOC proteins varies across  
190 species. The *C. elegans* SMOC-1 protein is predicted to have one TY domain, one EC domain,  
191 and completely lack the follistatin (FS) domain that is present in other SMOC proteins (Figure  
192 2C). Within the TY domain, SMOC-1 shares about 30% amino acid identity and 50% similarity  
193 with human SMOC1 and SMOC2, and contains a CWCV tetrapeptide sequence and an  
194 additional four conserved cysteines that are characteristic of the TY domain (Figure 2D). The EC  
195 domain of SMOC-1 shares about 25% amino acid identity and 45% similarity with those of the

196 human SMOC proteins. Among the conserved residues in the EC domain are four cysteines  
197 thought to be involved in disulfide bond formation (BUSCH *et al.* 2000).

198 The locations of the molecular lesions in our *smoc-1* mutant alleles suggest that both the  
199 TY domain and the EC domain are important for SMOC-1 function. *jj85* is a mutation in the TY  
200 domain, changing amino acid 105 from a glutamic acid to a lysine (E105K, Figure 2B,D).  
201 Although the change appears to make this residue more similar to its counterpart (arginine or  
202 lysine) in the fly and human SMOC proteins (Figure 2D), we noted that E105 is conserved in  
203 multiple nematode species (Figure 2F). We also obtained a *smoc-1* cDNA clone that has a single  
204 base mutation changing amino acid 103 from a conserved serine to proline (Figure 2D). This  
205 mutant *smoc-1* cDNA (S103P) failed to rescue the *smoc-1(0)* Susm phenotype, while the wild-  
206 type (WT) *smoc-1* cDNA under the same regulatory elements successfully rescued the *smoc-1(0)*  
207 Susm phenotype (Table 3), again highlighting the importance of the TY domain for SMOC-1  
208 function. Similarly, the EC domain is also critical for SMOC-1 function, because a change of the  
209 conserved cysteine residue at amino acid 210 to tyrosine (C210Y) in *jj65* significantly  
210 compromised the function of SMOC-1 (Figure 2B,E, Table 3).

211

### 212 **SMOC-1 functions within the BMP pathway to positively regulate BMP signaling**

213 We have previously shown that mutations in BMP pathway components specifically  
214 suppress the *sma-9(0)* M lineage defect (FOEHR *et al.* 2006; LIU *et al.* 2015). The highly  
215 penetrant Susm phenotype of multiple *smoc-1* alleles suggests that SMOC-1 may function in the  
216 BMP pathway. BMP pathway mutants are known to exhibit altered body sizes (SAVAGE-DUNN  
217 AND PADGETT 2017). We measured the body sizes of *smoc-1* single mutant animals and found  
218 that they all have a reproducibly smaller body size (~95%) compared to WT animals at the same

219 developmental stage (Figure 3A,B,D). This smaller body size can be rescued by a WT *smoc-1*  
220 transgene (Figure 3D). Moreover, transgenic *smoc-1* mutant animals carrying this transgene are  
221 significantly longer than WT animals (Figure 3D). This is likely due to the repetitive nature of  
222 the transgene generated using standard *C. elegans* transgenic approaches, which often results in  
223 over-expression of the transgene (MELLO *et al.* 1991). We have subsequently integrated the WT  
224 *smoc-1* transgene in the WT background (*jjIs5119*, Table 1). Again, *jjIs5119* (which we have  
225 referred to as *smoc-1(OE)*) animals are significantly longer than WT animals (Figure 4B). Thus,  
226 *smoc-1* appears to function in a dose-dependent manner to positively regulate body size.

227 To determine whether *smoc-1* functions within the BMP pathway to regulate body size, we  
228 generated double mutants between *smoc-1(tm7125)* and null mutations in various BMP pathway  
229 components, and measured their body lengths. As shown in Figure 4A, *dbl-1(ok3749) smoc-*  
230 *1(tm7125)* double mutants were as small as *dbl-1(ok3749)* single mutants. Similarly, *sma-3(jj3);*  
231 *smoc-1(tm7125)* and *sma-6(jj1); smoc-1(tm7125)* double mutants were as small as *sma-3(jj3)*  
232 and *sma-6(jj1)* single mutants, respectively. These observations indicate that *smoc-1* functions  
233 within the BMP pathway, rather than in a parallel pathway, to regulate body size.

234 In addition to body size, BMP pathway mutants also exhibit male tail defects and the  
235 mutant males cannot mate (SAVAGE *et al.* 1996; KRISHNA *et al.* 1999; SUZUKI *et al.* 1999). We  
236 generated *smoc-1(tm7125)* males and found that they mated well with WT hermaphrodites to  
237 produce cross progeny, suggesting that *smoc-1(tm7125)* males do not have severe male tail  
238 patterning defects. This is not surprising as previous studies have demonstrated that male tail  
239 development is not affected when there is a partial reduction of BMP signaling (KRISHNA *et al.*  
240 1999).

241 We also examined the expression of the RAD-SMAD reporter, which we have previously  
242 shown to serve as a direct readout of BMP signaling (TIAN *et al.* 2010). While *smoc-1* null  
243 mutants did not exhibit significant changes in the expression of the RAD-SMAD reporter (data  
244 now shown), the *smoc-1(OE)* lines showed a significant increase in the level of RAD-SMAD  
245 reporter expression (Figure 4C,D). We reasoned that the change of RAD-SMAD reporter  
246 expression in *smoc-1(0)* mutants may be too small to detect given that *smoc-1(0)* mutants only  
247 exhibit about 5% reduction in body size compared to WT animals (see above). Nevertheless, our  
248 findings are consistent with SMOC-1 acting in the BMP pathway to positively promote BMP  
249 signaling.

250

251 **SMOC-1 functions through the BMP ligand to promote BMP signaling in regulating body**  
252 **size**

253 The long body size phenotype caused by *smoc-1* overexpression provided us with a useful  
254 tool to determine where in the BMP signaling pathway SMOC-1 functions. We conducted  
255 genetic epistasis analysis by generating double mutants between *smoc-1(OE)* and null mutations  
256 in core components of the BMP pathway that are known to cause a small body size. As shown in  
257 Figure 4B, *smoc-1(OE); dbl-1(ok3749)* double mutants and *smoc-1(OE); sma-3(tm4625)* double  
258 mutants are as small as *dbl-1(ok3749)* and *sma-3(tm4625)* single mutants, respectively. These  
259 results provide further support to the conclusion that SMOC-1 functions within the BMP  
260 pathway to regulate body size. More importantly, our genetic epistasis results demonstrate that  
261 SMOC-1 functions upstream of and is dependent on the function of the BMP ligand DBL-1 to  
262 regulate body size.

263

264 **SMOC-1 antagonizes the function of LON-2/glypican to modulate BMP signaling in**  
265 **regulating body size**

266 Previous studies have shown that the glypican LON-2 functions upstream of DBL-  
267 1/BMP and acts as a negative regulator of BMP signaling (GUMIENNY *et al.* 2007). We  
268 performed double mutant analysis and dissected the relationship between SMOC-1 and LON-  
269 2/glypican. We first measured the body length of double null mutants between *smoc-1* and *lon-2*.  
270 As shown in Figure 5A, *smoc-1(tm7125); lon-2(e678)* double null mutants exhibited an  
271 intermediate body size compared to either single null mutant. In particular, the body size of  
272 *smoc-1(tm7125); lon-2(e678)* double mutants is similar to that of WT animals. These  
273 observations suggest that SMOC-1 and LON-2/glypican antagonize each other in regulating  
274 body size. Interestingly, *smoc-1(OE); lon-2(e678)* worms are longer than either *smoc-1(OE)*  
275 animals or *lon-2(e678)* single mutants (Figure 5B). Thus, over-expressing *smoc-1* is capable of  
276 further increasing the body size of worms that completely lack LON-2/glypican. Taken together,  
277 our genetic analysis between *lon-2* and *smoc-1* suggests that SMOC-1 antagonizes the function  
278 of LON-2/glypican in regulating body size, and that SMOC-1 also has LON-2/glypican-  
279 independent function(s) in promoting BMP signaling.

280

281 **SMOC-1 does not play a major role in the TGF $\beta$ -like dauer pathway**

282 In addition to the BMP pathway, *C. elegans* has a TGF $\beta$ -like signaling pathway that  
283 regulates dauer development (SAVAGE-DUNN AND PADGETT 2017). To determine if SMOC-1  
284 plays a role in the TGF $\beta$ -like dauer pathway, we first assayed dauer formation of worms with  
285 different levels of *smoc-1* expression. *smoc-1(tm7125)* and *smoc-1(OE)* single mutant worms did  
286 not exhibit any constitutive or defective dauer formation phenotype at any of the temperatures

287 tested (Table 4, data not shown), suggesting that SMOC-1 does not play a major role in the  
288 TGF $\beta$ -like dauer pathway. Next, we generated double mutant worms carrying both *smoc-*  
289 *1(tm7125)* and mutations in the TGF $\beta$  ligand DAF-7/TGF $\beta$  or the type 1 receptor DAF-1/RI  
290 (GEORGI *et al.* 1990; REN *et al.* 1996), and examined them for the constitutive dauer formation  
291 (Daf-c) phenotype (Table 1). While *smoc-1(tm7125)* partially suppressed the Daf-c phenotype of  
292 *daf-7(e1372)* at 20°C, a similar trend was not observed at either 15°C or at 25°C. Similarly,  
293 *smoc-1(tm7125)* did not exhibit any consistent suppression or enhancement of the Daf-c  
294 phenotype of two *daf-1* mutant alleles (Table 4). These results suggest that SMOC-1 does not  
295 play a major role in the TGF $\beta$ -like dauer pathway, although we cannot rule out a minor buffering  
296 function of SMOC-1 in this pathway.

297         Because of the genetic interaction that we observed between *smoc-1* and *lon-2*, we also  
298 tested whether LON-2/glypican plays a role in the TGF $\beta$ -like dauer pathway by performing  
299 similar double mutant analysis as described for *smoc-1*. At 20°C, *lon-2(e678)* showed partial  
300 suppression of the Daf-c phenotype of *daf-7(e1372)* (Table 5), but a similar trend was not  
301 observed at 15°C or at 25°C (Table 5). As seen with *smoc-1(tm7125)*, *lon-2(e678)* also did not  
302 consistently enhance or suppress the Daf-c phenotype of a TGF $\beta$  receptor mutation, *daf-1(m213)*.  
303 Thus, like SMOC-1, LON-2 does not appear to play a major role, but may play a minor  
304 modulatory role, in the TGF $\beta$  dauer pathway.

305

### 306 ***smoc-1* is expressed in the pharynx, intestine, and posterior hypodermis**

307         Since *smoc-1* is predicted to encode a secreted protein, we first attempted to identify the  
308 cells that express *smoc-1*. As described above, a *smoc-1* genomic fragment containing 2kb  
309 upstream sequences, the entire coding region with introns, and 2kb downstream sequences



310 (pJKL1128, Table 2) can rescue the Susm and body size phenotypes of *smoc-1(0)* mutants  
311 (Figure 6A, Table 3). The same promoter element driving the *smoc-1* cDNA with its own 3'UTR  
312 or with the *unc-54* 3'UTR rescued both the small body size and the Susm phenotypes of *smoc-*  
313 *1(0)* mutants (Figure 6A; Table 3), suggesting that the regulatory elements required for SMOC-1  
314 function in BMP signaling reside in the 2kb upstream sequences. We therefore generated a  
315 transcriptional reporter *pJKL1139[smoc-1 2kb promoter::4xnl::gfp::unc-54 3'UTR]* (Table 2).  
316 We also generated two additional transcriptional reporters using 5kb *smoc-1* upstream sequences  
317 (*pJKL1201[smoc-1 5kb promoter::4xnl::gfp::unc-54 3'UTR]* and *pJKL1202[smoc-1 5kb*  
318 *promoter::4xnl::gfp::2kb smoc-1 3'UTR]*, Table 2). All three reporters showed similar  
319 expression patterns in transgenic animals. We therefore focused on *pJKL1139[smoc-1 2kb*  
320 *promoter::4xnl::gfp::unc-54 3'UTR]* and generated integrated transgenic lines carrying this  
321 reporter (*jjIs4688* and *jjIs4694*, Table 1) for further analysis.

322 The integrated *smoc-1* transcriptional reporter showed strong GFP expression. GFP was  
323 first detectable in several cells located in the anterior of bean stage embryos (Fig 6F). In the  
324 developing larvae, GFP is expressed in cells of the pharynx, the intestine and the posterior  
325 hypodermis (Fig 6B). Pharyngeal cells expressing *smoc-1p::gfp* include the epithelial cells e2,  
326 the marginal cells mc1 and mc2, the M4 neuron, and all six of the pharyngeal/intestinal valve  
327 cells (Figure 6C). Cells of the posterior hypodermis expressing *smoc-1p::gfp* include hyp8, hyp9,  
328 hyp10, and hyp11 (Fig 6D). Expression in these tissues persisted from the L1 larval stage  
329 through adulthood. We noted that while all transgenic animals showed GFP expression in the  
330 pharynx and the posterior hypodermis, a small fraction of animals (~8%) did not exhibit GFP  
331 expression in all or some of the intestinal cells (Figure 6G). We observed no GFP expression in

332 any other tissues, including the nerve cord, body wall muscles (BWMs), or the M lineage. Thus,  
333 *smoc-1* is expressed in cells of the pharynx, intestine, and posterior hypodermis.

334

### 335 **Intestinal expression of *smoc-1* is positively regulated by BMP signaling**

336 We next asked whether *smoc-1* expression is regulated by the BMP pathway or by SMOC-  
337 1 itself. We introduced the integrated *smoc-1* transgenic reporter into BMP pathway null  
338 mutants, including *sma-3(jj3)*, *sma-6(jj1)*, *lon-2(e678)* and *smoc-1(tm7125)* mutants (Table 1),  
339 and examined the expression pattern of the GFP reporter. Intriguingly, while the expression  
340 pattern and expression level of the GFP reporter in the pharynx and posterior hypodermis  
341 remained relatively constant in all mutant background examined, in *sma-6(jj1)* and *sma-3(jj3)*  
342 mutants there was a significant decrease in the percentage of animals that exhibited GFP  
343 expression in the intestinal cells and a decrease in the intensity of intestinal GFP expression  
344 compared with WT animals (Figure 6F, G). There was also a moderate decrease in the  
345 percentage of animals showing intestinal GFP expression in *smoc-1(tm7125)* mutants (Figure  
346 6G). In contrast, nearly 100% of *lon-2(e678)* animals showed bright intestinal GFP expression,  
347 as compared to ~92% for WT animals (Figure 6G). Collectively, these results suggest that *smoc-*  
348 *1* expression in the intestinal cells is positively regulated by BMP signaling.

349

### 350 ***smoc-1* functions cell non-autonomously to regulate body size and M lineage development**

351 The *smoc-1* transcriptional reporters identified cells in the pharynx, intestine, and posterior  
352 hypodermis as *smoc-1*-expressing cells. To determine in which tissue(s) expression of *smoc-1* is  
353 sufficient to regulate BMP signaling, we used a set of promoters to drive *smoc-1* cDNA in a  
354 tissue-specific manner, and assayed for rescue of the *smoc-1(tm7125)* mutant phenotypes. Each

355 rescuing construct was introduced into *smoc-1(tm7125)* worms for the body size assay, and into  
356 *smoc-1(tm7125); sma-9(cc604)* worms for the Susm assay.

357 As shown in Figure 7A, forced expression of *smoc-1* cDNA specifically within each  
358 individual *smoc-1*-expressing tissue (*ifb-2p* for intestinal cells (HUSKEN *et al.* 2008), *myo-2p* for  
359 pharyngeal muscles (OKKEMA *et al.* 1993), or *elt-3p* for hypodermal cells (GILLEARD *et al.*  
360 1999)) not only rescued the small body size of *smoc-1(tm7125)* mutants, but also made the  
361 transgenic worms longer, just like *smoc-1* cDNA under the control of its own promoter. Forced  
362 expression of *smoc-1* cDNA in tissues that do not express *smoc-1* (*myo-3p* for BWMs (OKKEMA  
363 *et al.* 1993) or *rab-3p* for neurons (NONET *et al.* 1997)) also rescued the small body size of *smoc-*  
364 *1(tm7125)* mutants, and made the transgenic worms longer (Figure 7A). An exception is the lack  
365 of rescue of the body size phenotype in *smoc-1(tm7125)* mutants upon forced expression of  
366 *smoc-1* cDNA in the M lineage using the *hlh-8* promoter (HARFE *et al.* 1998). This could be due  
367 to the transient nature of *hlh-8* promoter activity in undifferentiated M lineage cells during larval  
368 development (HARFE *et al.* 1998).

369 Similar to the body size rescue results, forced expression of *smoc-1* cDNA in both *smoc-1-*  
370 expressing cells (intestine, pharynx, or hypodermis) and cells that do not normally express *smoc-*  
371 *1* (BWMs, neurons, or the M lineage) rescued the Susm phenotype of *smoc-1(tm7125)* mutants  
372 (Figure 7B), although for reasons currently unknown, the rescuing efficiency appeared lower  
373 when *smoc-1* expression was forced in BWMs or neurons (Figure 7B). Taken together, our  
374 results demonstrate that SMOC-1 can function cell non-autonomously to regulate both body size  
375 and M lineage patterning. This is consistent with SMOC-1 being a putative secreted protein.

376

377 **Human SMOC proteins can partially rescue the *smoc-1(0)* mutant phenotype in *C. elegans***

378 As described above, SMOC-1 has two human homologs, SMOC1 (hSMOC1) and SMOC2  
379 (hSMOC2). We next asked whether either of the human SMOCs can substitute for SMOC-1  
380 function in *C. elegans*. We first generated plasmids by directly putting the coding region of  
381 hSMOC1 or hSMOC2 in between the 2kb *smoc-1* promoter and the *unc-54* 3'UTR (Table 2,  
382 Figure 8A), and tested their functionality using the Susm assay. Neither hSMOC1 nor hSMOC2  
383 rescued the Susm phenotype of *smoc-1(tm7125)* worms (Figure 8B). We reasoned that the lack  
384 of rescue may be due to differences in the signal peptide between humans and *C. elegans*,  
385 causing the proteins to not be properly secreted from cells (TIAN *et al.* 2010). We next generated  
386 plasmids expressing chimeric SMOC proteins that have the worm SMOC-1 signal peptide  
387 (CelSP) followed by the extracellular region of hSMOC1 or hSMOC2 (Table 2, Figure 8A).  
388 Both CelSP::hSMOC1 and CelSP::hSMOC2 partially rescued the Susm phenotype of *smoc-*  
389 *1(tm7125)* mutants (Figure 8B), but failed to rescue the body size phenotype (Figure 8C).  
390 Nevertheless, these results demonstrate that CelSP::hSMOC1 and CelSP::hSMOC2 can function  
391 to regulate BMP signaling in a *C. elegans* trans-environment and suggest that the function of  
392 SMOC proteins in regulating BMP signaling is evolutionarily conserved from worms to humans.

393

## 394 **DISCUSSION**

395 In this study, we identified SMOC-1, the sole *C. elegans* SMOC protein that belongs to the  
396 SPARC/BM40 family of matricellular proteins, as a key player in the BMP signaling pathway.  
397 *smoc-1(0)* mutants have a small body size and suppress the *sma-9(0)* M lineage defect, but *smoc-*  
398 *1(0)* mutants are not as small as null mutants in core components of the BMP pathway (Table 3,  
399 Figures 1, 3). These phenotypes resemble those caused by mutations in other modulators of the  
400 BMP pathway, such as DRAG-1/RGM (TIAN *et al.* 2010), TSP-21 (LIU *et al.* 2015), or SUP-

401 17/ADAM10 (WANG *et al.* 2017), and are consistent with a modulatory role for SMOC-1 in the  
402 BMP pathway. Over-expression of *smoc-1* led to a significant increase in body size and an  
403 increase in RAD-SMAD reporter expression. Moreover, the long body size phenotype caused by  
404 *smoc-1(OE)* is completely suppressed by null mutations in the BMP ligand DBL-1 and the R-  
405 Smad SMA-3 (Figure 4). Collectively, these findings demonstrate that SMOC-1 functions  
406 through the BMP ligand DBL-1 and acts as a positive modulator to promote BMP signaling.

407 How might SMOC-1 function to promote BMP signaling? Our tissue specific rescue data  
408 coupled with the expression pattern of *smoc-1* (Figures 6, 7) showed that SMOC-1 functions cell  
409 non-autonomously to regulate BMP signaling. This is consistent with SMOC-1 being a predicted  
410 secreted protein. Strikingly, forced expression of *smoc-1* exclusively in pharyngeal muscles is  
411 sufficient to rescue both the body size and the Susm phenotype of *smoc-1(0)* mutants (Figure 7).  
412 Notably, the M lineage cells, where the Smad proteins function to regulate M lineage  
413 development (FOEHR *et al.* 2006), are located in the posterior of a developing larva, distant from  
414 the pharynx. Thus SMOC-1 can function over long distances, from a source located far from  
415 BMP-receiving cells, to regulate the output of BMP signaling.

416 The *Drosophila* homolog of SMOC-1, Pent, can also function over long distances to  
417 regulate Dpp/BMP signaling in the developing wing imaginal discs (VUILLEUMIER *et al.* 2010).  
418 In particular, Pent has been shown to bind to and induce the internalization of the BMP co-  
419 receptor Dally/glypican (a heparan sulfate proteoglycans (HSPG)), such that the trapping of  
420 Dpp/BMP by Dally is reduced, which in turn promotes the spreading of Dpp/BMP (NORMAN *et*  
421 *al.* 2016). Using a *Xenopus* animal cap transfer assay, Thomas and colleagues (THOMAS *et al.*  
422 2017) showed that *Xenopus* SMOC-1 can also expand the range of BMP signaling by competing  
423 with BMP to bind to HSPGs. In *C. elegans*, the glypican homolog LON-2 is a known negative

424 regulator of BMP signaling, and LON-2 can bind to BMP *in vitro* (GUMIENNY *et al.* 2007).  
425 LON-2/glypican has therefore been proposed to negatively regulate BMP signaling by  
426 sequestering the DBL-1/BMP ligand. Our genetic analysis between *lon-2(0)* and *smoc-1(0)* null  
427 mutations suggests that SMOC-1 antagonizes the function of LON-2 in regulating BMP  
428 signaling (Figure 5A). The phenotype of *smoc-1(0); lon-2(0)* double mutants is consistent with a  
429 model where SMOC-1 promotes BMP signaling by competing with DBL-1/BMP to bind LON-  
430 2/glypican. However, SMOC-1 must have LON-2/glypican-independent function(s), because  
431 *smoc-1(OE)* can further increase body size in the absence of LON-2/glypican, as in *smoc-1(OE)*;  
432 *lon-2(0)* double mutants shown in Figure 5B.

433       The molecular mechanism underlying the LON-2/glypican-independent function of  
434 SMOC-1 is currently unknown. In addition to LON-2, there are five other HSPG-encoding genes  
435 in the *C. elegans* genome: *unc-52* (ROGALSKI *et al.* 1993; HALFTER *et al.* 1998; ACKLEY *et al.*  
436 2001; RHINER *et al.* 2005; HRUS *et al.* 2007). It is possible that in addition to LON-2/glypican,  
437 one or multiple of these other HSPGs also functions with SMOC-1 to regulate BMP signaling.  
438 Alternatively, SMOC-1 may promote BMP signaling by interacting with other cell surface or  
439 extracellular BMP regulators or even with DBL-1/BMP itself to promote BMP signaling. Any  
440 LON-2/glypican-independent function of SMOC-1 still requires DBL-1/BMP, because *smoc-*  
441 *1(OE); dbl-1(0)* double mutants are as small as *dbl-1(0)* null mutants. Our model proposing  
442 SMOC-1 has dual modes of action to regulate BMP signaling is consistent with structure-  
443 function analysis of *Xenopus* SMOC-1 (XSMOC-1), whose EC domains can bind to HSPG and  
444 promote BMP spreading, while the TY domains are necessary for XSMOC-1 to inhibit BMP  
445 signaling (THOMAS *et al.* 2017). We have shown that both the TY domain and the EC domain in  
446 *C. elegans* SMOC-1 are important for its function in BMP signaling, because mutations in either

447 domain disrupt the function of SMOC-1 (Figure 2). Further dissection of the roles of each of  
448 these domains at the molecular level will help clarify the mechanisms underlying SMOC-1  
449 function in the BMP pathway.

450 In this study, we have shown that in addition to being a positive regulator of BMP  
451 signaling, *smoc-1* is also positively regulated by BMP signaling at the transcriptional level  
452 (Figure 6). Whether *smoc-1* is directly or indirectly regulated by BMP signaling remains to be  
453 determined. Nevertheless, our results suggest a model in which SMOC-1 functions in a positive  
454 feedback loop to regulate BMP signaling (Figure 9). Whether or not *smoc-1* expression is  
455 directly regulated by BMP signaling is currently unknown.

456 In addition to their roles in regulating BMP signaling, SMOC proteins can also function in  
457 other signaling pathways. Pent has been shown to play a role in regulating Wg signaling in the  
458 *Drosophila* wing (NORMAN *et al.* 2016). Human SMOC1 can bind to the TGF $\beta$  co-receptor  
459 endoglin to regulate TGF $\beta$  signaling in endothelial cells (AWWAD *et al.* 2015), while SMOC2  
460 can potentiate endothelial growth factor or fibroblast growth factor activity to promote  
461 angiogenesis in cultured human umbilical vein endothelial cells (HUVECs) (ROCNIK *et al.*  
462 2006). Our genetic analysis suggests that SMOC-1 does not play a key role in regulating the  
463 TGF $\beta$ -like dauer pathway (Table 4). Whether SMOC-1 is involved in other signaling pathways  
464 in *C. elegans* is currently unknown.

465 There are two SMOC homologs in mammals. SMOC1 is essential for eye and limb  
466 development in mice, and mutations in SMOC1 in humans cause microphthalmia with limb  
467 anomalies (MLA) and ophthalmo-acromelic syndrome (OAS) (also known as Waardenburg  
468 anophthalmia syndrome (WAS)), both of which affect eye and limb development (OKADA *et al.*  
469 2011; RAINGER *et al.* 2011). Mutations in hSMOC2 have also been found to be associated with



470 defects in dental development (BLOCH-ZUPAN *et al.* 2011; ALFAWAZ *et al.* 2013) and vitiligo  
471 (ALKHATEEB *et al.* 2010; BIRLEA *et al.* 2010). QTL mapping in different dog breeds have found  
472 that a retrotransposon insertion that disrupts SMOC2 splicing and reduces its expression is  
473 associated with canine brachycephaly (MARCHANT *et al.* 2017). In addition, several different  
474 types of brain tumors exhibit altered expression of SMOC1 (BRELLIER *et al.* 2011), while  
475 SMOC2 is an intestinal stem cell signature gene (MUNOZ *et al.* 2012) that is required for L1-  
476 mediated colon cancer progression (SHVAB *et al.* 2016). Notably, BMP signaling is known to  
477 play important roles in eye, tooth and limb development, and abnormal BMP signaling can cause  
478 cancer (THAWANI *et al.* 2010). Here, we have demonstrated that both hSMOC1 and hSMOC2  
479 can partially rescue the Susm phenotype of *smoc-1(0)* mutants (Figure 8), suggesting that the  
480 function of SMOC proteins in regulating BMP signaling is evolutionarily conserved. Future  
481 studies on how SMOC-1 functions to regulate BMP signaling in an *in vivo* system such as *C.*  
482 *elegans* may have implications for human health.

483

#### 484 **ACKNOWLEDGMENTS**

485 We thank Oliver Hobert and Shohei Mitani for plasmids or strains, Florencia Schlamp for  
486 advice on statistical analysis using R, Gabriela Rojas for help generating the *smoc-1(OE)*; *RAD-*  
487 *SMAD* strains, and the rest of the Liu lab for critical comments and suggestions. Some strains  
488 were obtained from the *C. elegans* Genetics Center, which is funded by NIH Office of 27  
489 Research Infrastructure Programs (P40 OD010440). This study was supported by the National  
490 Institutes of Health grants R01 GM066953 and R01 GM103869 to JL. MSD was partially  
491 supported by a NIH Predoctoral Training Grant (T32GM007617), a Dean's Excellence  
492 Fellowship by the Cornell Graduate School, and an NSF Graduate Research Fellowship (DGE-



493 1650441). AE was a student in the MBG-REU program, which was supported by the NSF  
494 (DBI1659534), Department of Molecular Biology and Genetics, Weill Institute of Cell and  
495 Molecular Biology, and Division of Nutritional Sciences at Cornell University. ANM was a  
496 Hunter R. Rawlings III Presidential Research Scholar at Cornell University.

## 497 LITERATURE CITED

- 498 Ackley, B. D., J. R. Crew, H. Elamaa, T. Pihlajaniemi, C. J. Kuo *et al.*, 2001 The NC1/endostatin  
499 domain of *Caenorhabditis elegans* type XVIII collagen affects cell migration and axon  
500 guidance. *J Cell Biol* 152: 1219-1232.
- 501 Alfawaz, S., F. Fong, V. Plagnol, F. S. Wong, J. Fearne *et al.*, 2013 Recessive oligodontia linked  
502 to a homozygous loss-of-function mutation in the SMOC2 gene. *Arch Oral Biol* 58: 462-  
503 466.
- 504 Alkhateeb, A., N. Al-Dain Marzouka and F. Qarqaz, 2010 SMOC2 gene variant and the risk of  
505 vitiligo in Jordanian Arabs. *Eur J Dermatol* 20: 701-704.
- 506 Awwad, K., J. Hu, L. Shi, N. Mangels, R. Abdel Malik *et al.*, 2015 Role of secreted modular  
507 calcium-binding protein 1 (SMOC1) in transforming growth factor beta signalling and  
508 angiogenesis. *Cardiovasc Res* 106: 284-294.
- 509 Birlea, S. A., K. Gowan, P. R. Fain and R. A. Spritz, 2010 Genome-wide association study of  
510 generalized vitiligo in an isolated European founder population identifies SMOC2, in  
511 close proximity to IDDM8. *J Invest Dermatol* 130: 798-803.
- 512 Bloch-Zupan, A., X. Jamet, C. Etard, V. Laugel, J. Muller *et al.*, 2011 Homozygosity mapping  
513 and candidate prioritization identify mutations, missed by whole-exome sequencing, in  
514 SMOC2, causing major dental developmental defects. *Am J Hum Genet* 89: 773-781.
- 515 Bradshaw, A. D., 2012 Diverse biological functions of the SPARC family of proteins. *Int J*  
516 *Biochem Cell Biol* 44: 480-488.
- 517 Bragdon, B., O. Moseychuk, S. Saldanha, D. King, J. Julian *et al.*, 2011 Bone morphogenetic  
518 proteins: a critical review. *Cell Signal* 23: 609-620.
- 519 Brazil, D. P., R. H. Church, S. Surae, C. Godson and F. Martin, 2015 BMP signalling: agony and  
520 antagonism in the family. *Trends Cell Biol* 25: 249-264.
- 521 Brellier, F., S. Ruggiero, D. Zwolanek, E. Martina, D. Hess *et al.*, 2011 SMOC1 is a tenascin-C  
522 interacting protein over-expressed in brain tumors. *Matrix Biol* 30: 225-233.
- 523 Brenner, S., 1974 The genetics of *Caenorhabditis elegans*. *Genetics* 77: 71-94.
- 524 Busch, E., E. Hohenester, R. Timpl, M. Paulsson and P. Maurer, 2000 Calcium affinity,  
525 cooperativity, and domain interactions of extracellular EF-hands present in BM-40. *J Biol*  
526 *Chem* 275: 25508-25515.
- 527 Estevez, M., L. Attisano, J. L. Wrana, P. S. Albert, J. Massague *et al.*, 1993 The *daf-4* gene  
528 encodes a bone morphogenetic protein receptor controlling *C. elegans* dauer larva  
529 development. *Nature* 365: 644-649.
- 530 Finn, R. D., T. K. Attwood, P. C. Babbitt, A. Bateman, P. Bork *et al.*, 2017 InterPro in 2017-  
531 beyond protein family and domain annotations. *Nucleic Acids Res* 45: D190-d199.
- 532 Foehr, M. L., A. S. Lindy, R. C. Fairbank, N. M. Amin, M. Xu *et al.*, 2006 An antagonistic role  
533 for the *C. elegans* Schnurri homolog SMA-9 in modulating TGFbeta signaling during  
534 mesodermal patterning. *Development* 133: 2887-2896.
- 535 Georgi, L. L., P. S. Albert and D. L. Riddle, 1990 *daf-1*, a *C. elegans* gene controlling dauer  
536 larva development, encodes a novel receptor protein kinase. *Cell* 61: 635-645.
- 537 Gilleard, J. S., Y. Shafi, J. D. Barry and J. D. McGhee, 1999 ELT-3: A *Caenorhabditis elegans*  
538 GATA factor expressed in the embryonic epidermis during morphogenesis. *Dev Biol*  
539 208: 265-280.

- 540 Gumienny, T. L., L. T. MacNeil, H. Wang, M. de Bono, J. L. Wrana *et al.*, 2007 Glypican LON-  
541 2 is a conserved negative regulator of BMP-like signaling in *Caenorhabditis elegans*.  
542 *Curr Biol* 17: 159-164.
- 543 Gumienny, T. L., and C. Savage-Dunn, 2013 TGF-beta signaling in *C. elegans*. *WormBook*: 1-  
544 34.
- 545 Halfter, W., S. Dong, B. Schurer and G. J. Cole, 1998 Collagen XVIII is a basement membrane  
546 heparan sulfate proteoglycan. *J Biol Chem* 273: 25404-25412.
- 547 Harfe, B. D., A. Vaz Gomes, C. Kenyon, J. Liu, M. Krause *et al.*, 1998 Analysis of a  
548 *Caenorhabditis elegans* Twist homolog identifies conserved and divergent aspects of  
549 mesodermal patterning. *Genes Dev* 12: 2623-2635.
- 550 Hohenester, E., P. Maurer, C. Hohenadl, R. Timpl, J. N. Jansonius *et al.*, 1996 Structure of a  
551 novel extracellular Ca(2+)-binding module in BM-40. *Nat Struct Biol* 3: 67-73.
- 552 Hrus, A., G. Lau, H. Hutter, S. Schenk, J. Ferralli *et al.*, 2007 *C. elegans* agrin is expressed in  
553 pharynx, IL1 neurons and distal tip cells and does not genetically interact with genes  
554 involved in synaptogenesis or muscle function. *PLoS One* 2: e731.
- 555 Husken, K., T. Wiesenfahrt, C. Abraham, R. Windoffer, O. Bossinger *et al.*, 2008 Maintenance  
556 of the intestinal tube in *Caenorhabditis elegans*: the role of the intermediate filament  
557 protein IFC-2. *Differentiation* 76: 881-896.
- 558 Katagiri, T., and T. Watabe, 2016 Bone Morphogenetic Proteins. *Cold Spring Harb Perspect Biol*  
559 8.
- 560 Krishna, S., L. L. Maduzia and R. W. Padgett, 1999 Specificity of TGFbeta signaling is  
561 conferred by distinct type I receptors and their associated SMAD proteins in  
562 *Caenorhabditis elegans*. *Development* 126: 251-260.
- 563 Liang, J., R. Lints, M. L. Foehr, R. Tokarz, L. Yu *et al.*, 2003 The *Caenorhabditis elegans*  
564 *schnurri* homolog *sma-9* mediates stage- and cell type-specific responses to DBL-1 BMP-  
565 related signaling. *Development* 130: 6453-6464.
- 566 Liu, Z., H. Shi, L. C. Szymczak, T. Aydin, S. Yun *et al.*, 2015 Promotion of bone morphogenetic  
567 protein signaling by tetraspanins and glycosphingolipids. *PLoS Genet* 11: e1005221.
- 568 Lowery, J. W., B. Brookshire and V. Rosen, 2016 A Survey of Strategies to Modulate the Bone  
569 Morphogenetic Protein Signaling Pathway: Current and Future Perspectives. *Stem Cells*  
570 *Int* 2016: 7290686.
- 571 Marchant, T. W., E. J. Johnson, L. McTeir, C. I. Johnson, A. Gow *et al.*, 2017 Canine  
572 Brachycephaly Is Associated with a Retrotransposon-Mediated Missplicing of SMOC2.  
573 *Curr Biol* 27: 1573-1584.e1576.
- 574 Mello, C. C., J. M. Kramer, D. Stinchcomb and V. Ambros, 1991 Efficient gene transfer in  
575 *C. elegans*: extrachromosomal maintenance and integration of transforming sequences.  
576 *Embo j* 10: 3959-3970.
- 577 Mok, D. Z., P. W. Sternberg and T. Inoue, 2015 Morphologically defined sub-stages of *C.*  
578 *elegans* vulval development in the fourth larval stage. *BMC Dev Biol* 15: 26.
- 579 Morita, K., K. L. Chow and N. Ueno, 1999 Regulation of body length and male tail ray pattern  
580 formation of *Caenorhabditis elegans* by a member of TGF-beta family. *Development*  
581 126: 1337-1347.
- 582 Morita, K., A. J. Flemming, Y. Sugihara, M. Mochii, Y. Suzuki *et al.*, 2002 A *Caenorhabditis*  
583 *elegans* TGF-beta, DBL-1, controls the expression of LON-1, a PR-related protein, that  
584 regulates polyploidization and body length. *Embo j* 21: 1063-1073.

- 585 Munoz, J., D. E. Stange, A. G. Schepers, M. van de Wetering, B. K. Koo *et al.*, 2012 The Lgr5  
586 intestinal stem cell signature: robust expression of proposed quiescent '+4' cell markers.  
587 *Embo j* 31: 3079-3091.
- 588 Nonet, M. L., J. E. Staunton, M. P. Kilgard, T. Fergestad, E. Hartwig *et al.*, 1997  
589 *Caenorhabditis elegans* rab-3 mutant synapses exhibit impaired function and are partially  
590 depleted of vesicles. *J Neurosci* 17: 8061-8073.
- 591 Norman, M., R. Vuilleumier, A. Springhorn, J. Gawlik and G. Pyrowolakakis, 2016 Pentagone  
592 internalises glypicans to fine-tune multiple signalling pathways. *Elife* 5.
- 593 Okada, I., H. Hamanoue, K. Terada, T. Tohma, A. Megarbane *et al.*, 2011 SMOC1 is essential  
594 for ocular and limb development in humans and mice. *Am J Hum Genet* 88: 30-41.
- 595 Okkema, P. G., S. W. Harrison, V. Plunger, A. Aryana and A. Fire, 1993 Sequence requirements  
596 for myosin gene expression and regulation in *Caenorhabditis elegans*. *Genetics* 135: 385-  
597 404.
- 598 R Core Team, 2015 R: A language and environment for statistical computing. R  
599 Foundation for Statistical Computing, pp.
- 600 Rainger, J., E. van Beusekom, J. K. Ramsay, L. McKie, L. Al-Gazali *et al.*, 2011 Loss of the  
601 BMP antagonist, SMOC-1, causes Ophthalmo-acromelic (Waardenburg Anophthalmia)  
602 syndrome in humans and mice. *PLoS Genet* 7: e1002114.
- 603 Ren, P., C. S. Lim, R. Johnsen, P. S. Albert, D. Pilgrim *et al.*, 1996 Control of *C. elegans* larval  
604 development by neuronal expression of a TGF-beta homolog. *Science* 274: 1389-1391.
- 605 Rhiner, C., S. Gysi, E. Frohli, M. O. Hengartner and A. Hajnal, 2005 Syndecan regulates cell  
606 migration and axon guidance in *C. elegans*. *Development* 132: 4621-4633.
- 607 Rocnik, E. F., P. Liu, K. Sato, K. Walsh and C. Vaziri, 2006 The novel SPARC family member  
608 SMOC-2 potentiates angiogenic growth factor activity. *J Biol Chem* 281: 22855-22864.
- 609 Rogalski, T. M., B. D. Williams, G. P. Mullen and D. G. Moerman, 1993 Products of the unc-52  
610 gene in *Caenorhabditis elegans* are homologous to the core protein of the mammalian  
611 basement membrane heparan sulfate proteoglycan. *Genes Dev* 7: 1471-1484.
- 612 Rual, J. F., J. Ceron, J. Koreth, T. Hao, A. S. Nicot *et al.*, 2004 Toward improving  
613 *Caenorhabditis elegans* phenome mapping with an ORFeome-based RNAi library.  
614 *Genome Res* 14: 2162-2168.
- 615 Salazar, V. S., L. W. Gamer and V. Rosen, 2016 BMP signalling in skeletal development,  
616 disease and repair. *Nat Rev Endocrinol* 12: 203-221.
- 617 Savage, C., P. Das, A. L. Finelli, S. R. Townsend, C. Y. Sun *et al.*, 1996 *Caenorhabditis elegans*  
618 genes sma-2, sma-3, and sma-4 define a conserved family of transforming growth factor  
619 beta pathway components. *Proc Natl Acad Sci U S A* 93: 790-794.
- 620 Savage-Dunn, C., and R. W. Padgett, 2017 The TGF-beta Family in *Caenorhabditis elegans*.  
621 *Cold Spring Harb Perspect Biol* 9.
- 622 Schindelin, J., I. Arganda-Carreras, E. Frise, V. Kaynig, M. Longair *et al.*, 2012 Fiji: an open-  
623 source platform for biological-image analysis. *Nat Methods* 9: 676-682.
- 624 Sedlmeier, G., and J. P. Sleeman, 2017 Extracellular regulation of BMP signaling: welcome to  
625 the matrix. *Biochem Soc Trans* 45: 173-181.
- 626 Shvab, A., G. Haase, A. Ben-Shmuel, N. Gavert, T. Brabletz *et al.*, 2016 Induction of the  
627 intestinal stem cell signature gene SMOC-2 is required for L1-mediated colon cancer  
628 progression. *Oncogene* 35: 549-557.

- 629 Suzuki, Y., M. D. Yandell, P. J. Roy, S. Krishna, C. Savage-Dunn *et al.*, 1999 A BMP homolog  
630 acts as a dose-dependent regulator of body size and male tail patterning in *Caenorhabditis*  
631 *elegans*. *Development* 126: 241-250.
- 632 Thawani, J. P., A. C. Wang, K. D. Than, C. Y. Lin, F. La Marca *et al.*, 2010 Bone  
633 morphogenetic proteins and cancer: review of the literature. *Neurosurgery* 66: 233-246;  
634 discussion 246.
- 635 Thomas, J. T., D. Eric Dollins, K. R. Andrykovich, T. Chu, B. G. Stultz *et al.*, 2017 SMOC can  
636 act as both an antagonist and an expander of BMP signaling. *Elife* 6.
- 637 Tian, C., D. Sen, H. Shi, M. L. Foehr, Y. Plavskin *et al.*, 2010 The RGM protein DRAG-1  
638 positively regulates a BMP-like signaling pathway in *Caenorhabditis elegans*.  
639 *Development* 137: 2375-2384.
- 640 Tian, C., H. Shi, S. Xiong, F. Hu, W. C. Xiong *et al.*, 2013 The neogenin/DCC homolog UNC-  
641 40 promotes BMP signaling via the RGM protein DRAG-1 in *C. elegans*. *Development*  
642 140: 4070-4080.
- 643 Vannahme, C., S. Gosling, M. Paulsson, P. Maurer and U. Hartmann, 2003 Characterization of  
644 SMOC-2, a modular extracellular calcium-binding protein. *Biochem J* 373: 805-814.
- 645 Vannahme, C., N. Smyth, N. Miosge, S. Gosling, C. Frie *et al.*, 2002 Characterization of SMOC-  
646 1, a novel modular calcium-binding protein in basement membranes. *J Biol Chem* 277:  
647 37977-37986.
- 648 Vowels, J. J., and J. H. Thomas, 1992 Genetic analysis of chemosensory control of dauer  
649 formation in *Caenorhabditis elegans*. *Genetics* 130: 105-123.
- 650 Vuilleumier, R., A. Springhorn, L. Patterson, S. Koidl, M. Hammerschmidt *et al.*, 2010 Control  
651 of Dpp morphogen signalling by a secreted feedback regulator. *Nat Cell Biol* 12: 611-  
652 617.
- 653 Wallace, I. M., O. O'Sullivan, D. G. Higgins and C. Notredame, 2006 M-Coffee: combining  
654 multiple sequence alignment methods with T-Coffee. *Nucleic Acids Res* 34: 1692-1699.
- 655 Wang, J., R. Tokarz and C. Savage-Dunn, 2002 The expression of TGFbeta signal transducers in  
656 the hypodermis regulates body size in *C. elegans*. *Development* 129: 4989-4998.
- 657 Wang, L., Z. Liu, H. Shi and J. Liu, 2017 Two Paralogous Tetraspanins TSP-12 and TSP-14  
658 Function with the ADAM10 Metalloprotease SUP-17 to Promote BMP Signaling in  
659 *Caenorhabditis elegans*. *PLoS Genet* 13: e1006568.
- 660 Wang, R. N., J. Green, Z. Wang, Y. Deng, M. Qiao *et al.*, 2014 Bone Morphogenetic Protein  
661 (BMP) signaling in development and human diseases. *Genes Dis* 1: 87-105.
- 662 Wu, M., G. Chen and Y. P. Li, 2016 TGF-beta and BMP signaling in osteoblast, skeletal  
663 development, and bone formation, homeostasis and disease. *Bone Res* 4: 16009.
- 664 Yoshida, S., K. Morita, M. Mochii and N. Ueno, 2001 Hypodermal expression of *Caenorhabditis*  
665 *elegans* TGF-beta type I receptor SMA-6 is essential for the growth and maintenance of  
666 body length. *Dev Biol* 240: 32-45.
- 667

668 **FIGURE LEGENDS**

669 **Fig 1. *smoc-1(0)* mutations suppress the *sma-9(0)* M lineage defect.**

670 (A) Schematic representation of the BMP signaling pathway in *C. elegans*. BMP: bone  
671 morphogenetic protein. RI: type I receptor. RII: type II receptor. R-Smad: receptor-associated  
672 Smad. Co-Smad: common mediator Smad. (B-C) Merged DIC and GFP images of L4 stage *sma-*  
673 *9(cc604)* (B) and *smoc-1(tm7125); sma-9(cc604)* (C) worms carrying the *CC::gfp* coelomocyte  
674 (CC) marker. Arrows indicate M-derived CCs. Asterisks (\*) denote embryonically-derived CCs.

675

676 **Fig 2. SMOC-1 is conserved from *C. elegans* to human.**

677 (A-B) Schematics of the *C. elegans smoc-1* gene (A) and the predicted SMOC-1 protein (B),  
678 respectively, showing the domain structure and the molecular lesions of various mutant alleles.  
679 SP: signal peptide. TY: thyroglobulin type I-like repeat. EC: secreted protein acidic and rich in  
680 cysteine (SPARC) extracellular calcium binding domain. (C) Schematic representation of *C.*  
681 *elegans* SMOC-1, *D. melanogaster* Pentagone, and *H. sapiens* SMOC1 and SMOC2, showing  
682 their domain structures. The two human SMOC proteins are of different lengths but share similar  
683 domain structures. FS: follistatin-like domain. (D-E) Alignment of the TY (D) and EC (E)  
684 domains from *C. elegans* SMOC-1, *D. melanogaster* Pentagone, and *H. sapiens* SMOC1 and  
685 SMOC2. Multiple copies of a certain domain in the same protein are numbered in order from the  
686 N-terminus to the C-terminus. Ce: *C. elegans*. Dm: *D. melanogaster*. Hs: *H. sapiens*. (F)  
687 Alignment of the TY domains from SMOC-1 homologs in various nematode species. Cel: *C.*  
688 *elegans*. Cre: *C. remanei*. Cbn: *C. brenneri*. Cbg: *C. briggsae*. Cja: *C. japonica*. Ppa:  
689 *Pristionchus pacificus*. In D-F, identical or conserved amino acids are shown on a black or grey  
690 background, respectively. Red boxes highlight residues mutated in certain *smoc-1* alleles. Blue



691 box indicates the residue changed in a *smoc-1* cDNA clone that rendered the protein non-  
692 functional.

693

694 **Fig 3. SMOC-1 regulates body size.**

695 (A-C) DIC images showing *smoc-1(tm7125)* (A), WT (B), and *smoc-1(OE)* (C) worms at the  
696 larval L4.3 stage. (D) Relative body length of developmental stage-matched WT and various  
697 *smoc-1* mutant worms. Each *smoc-1* mutant allele was outcrossed with N2 for at least three  
698 times, and two independent isolates for each allele (#s following the allele name) were used for  
699 body size measurement. The *smoc-1(+)* transgene was pMSD4[2kb *smoc-1p::smoc-1*  
700 *cDNA::2kb smoc-1 3'UTR*]. The body length of WT worms was set to 1.0. Error bars represent  
701 95% confidence interval (CI). An ANOVA followed by TukeyHSD was used to test for  
702 differences between genotypes. \*\*\*  $P < 0.0001$ .

703

704 **Fig 4. SMOC-1 functions through the BMP ligand to positively regulate BMP signaling.**

705 (A-B) Relative body length of developmental stage-matched WT and various mutant worms,  
706 including double mutants between *smoc-1(tm7125)* and null mutants in the BMP pathway (A),  
707 and double mutants between *smoc-1(OE)* and null mutants in the BMP pathway (B). Two  
708 independent isolates for each double mutant combination were used for body size measurement.  
709 The body length of WT worms was set to 1.0. Error bars represent 95% CI. (C) Representative  
710 GFP images showing RAD-SMAD reporter expression in hypodermal nuclei of WT, *lon-*  
711 *2(e678)*, and *smoc-1(OE)* worms, respectively. (D) Boxplot showing the relative RAD-SMAD  
712 GFP fluorescence intensity in WT (set to 1.0), *lon-2(e678)*, and two independent isolates of  
713 *smoc-1(OE)* worms. Each data point represents an average of the GFP fluorescence intensity

714 from five hypodermal nuclei in one worm. Approximately 40 worms were examined per  
715 genotype. For panels A, B and D, an ANOVA followed by TukeyHSD was used to test for  
716 differences between genotypes. ND: no difference. \*\*\*  $P < 0.0001$ .

717

718 **Fig 5. SMOC-1 antagonizes LON-2/glypican in regulating body size.**

719 Relative body length of developmental stage-matched WT (set to 1.0) and various mutant  
720 worms, including double mutants between *smoc-1(tm7125)* null and *lon-2(e678)* null (A), and  
721 double mutants between *smoc-1(OE)* and *lon-2(e678)* null (B). The body size of *smoc-*  
722 *1(tm7125); lon-2(e678)* double mutants is similar to that of WT animals, while *smoc-1(OE); lon-*  
723 *2(e678)* double mutants are longer than either one. Error bars represent 95% CI. An ANOVA  
724 followed by TukeyHSD was used to test for differences between genotypes. ND: no difference. \*  
725  $P < 0.01$ . \*\*  $P < 0.001$ . \*\*\*  $P < 0.0001$ .

726

727 **Fig 6. *smoc-1* is expressed in multiple tissues and its intestinal expression is positively**  
728 **regulated by BMP signaling.**

729 (A) Expression of *smoc-1* cDNA under different regulatory elements to test for rescue of the  
730 body size phenotype of *smoc-1(tm7125)* worms. For each construct, two independent transgenic  
731 lines were examined and the data were combined and averaged. Body sizes are relative to *smoc-*  
732 *1(tm7125)* mutant worms (set to 1.0), and all measurements were done on the same day. Error  
733 bars represent 95% CI. \*\*\*  $P < 0.0001$ . (B-F) Merged GFP and DIC images of wildtype worms  
734 (B-E) and a *sma-6(jj1)* mutant worm (F) carrying the integrated *smoc-1* transcriptional reporter  
735 *jjIs4688* (Table 1). GFP expression is detectable a bean stage embryo (E), and in cells of the  
736 pharynx (B-C), intestine (B), and posterior hypodermis (B, D) in a WT larva. GFP expression in



737 the intestine, but not in the pharynx or posterior hypodermis, is significantly reduced in *sma-*  
738 *6(jj1)* (**F**). Images are side views with anterior to the left and dorsal up. (**G**) Quantification of the  
739 penetrance of L4 stage animals showing intestinal expression of the *smoc-1* transcriptional  
740 reporter in wildtype and various BMP pathway mutants. Two independent isolates were assessed  
741 for each gene tested.

742

743 **Fig 7. *smoc-1* functions cell non-autonomously to regulate body size and M lineage**  
744 **development.**

745 Tissue specific expression of *smoc-1* cDNA to test for rescue of the body size (**A**) or Susm (**B**)  
746 phenotype of *smoc-1(tm7125)* worms. *smoc-1* cDNA was driven by each specific promoter to  
747 allow expression in a given tissue. All constructs used the *unc-54* 3'UTR. For each construct,  
748 two independent transgenic lines were examined and the measurements were averaged. (**A**) Body  
749 sizes are relative to *smoc-1(tm7125)* mutant worms (set to 1.0), and all measurements were done  
750 on the same day. Error bars represent 95% CI. (**B**) The Susm phenotype was scored in the  
751 background of *smoc-1(tm7125); sma-9(cc604); CC:::gfp*. Error bars represent standard error. \*\*  
752  $P < 0.001$ . \*\*\*  $P < 0.0001$ . ND: no difference.

753

754 **Fig 8. Human SMOC proteins can partially rescue the Susm phenotype of *smoc-1(0)***  
755 **mutants.**

756 (**A**) Schematics of SMOC homologs tested for function in *C. elegans*. Solid black outline  
757 indicates *C. elegans* protein sequences. Dashed grey line indicates human protein sequences. All  
758 ORFs were cloned into the same vector with the same regulatory elements (2kb *smoc-1* promoter  
759 and *unc-54* 3'UTR), and each construct was tested for rescue of Susm (**B**) and body size (**C**)

760 phenotype of *smoc-1(tm7125)* mutants. Two independent lines were assayed for each construct.

761 **(B)** The Susm phenotype was scored in the background of *smoc-1(tm7125); sma-9(cc604);*

762 *CC::gfp*. Error bars represent standard error. **(C)** Body sizes are relative to WT worms (set to

763 1.0), and all measurements were done on the same day. Error bars represent 95% CI. \*  $P < 0.01$ .

764 \*\*  $P < 0.001$ . \*\*\*  $P < 0.0001$ . ND: no difference.

765

766 **Fig 9. A model for SMOC-1 function in the BMP pathway.**

767 SMOC-1 acts through the BMP ligand DBL-1/BMP, and in part by antagonizing LON-

768 2/glypican, to promote BMP signaling. BMP signaling in turn promotes the intestinal expression

769 of *smoc-1*, thus creating a positive feedback loop.

**Table 1. Strains used in this study.**

| Strain ID                                                                      | Genotype                                                                                                                                         |
|--------------------------------------------------------------------------------|--------------------------------------------------------------------------------------------------------------------------------------------------|
| <b>Original <i>sma-9</i> suppressor strains from the EMS screen</b>            |                                                                                                                                                  |
| LW0040                                                                         | <i>arls37[secreted CC::gfp] I; cup-5(ar465) III; sma-9(cc604) X</i>                                                                              |
| LW2697                                                                         | <i>arls37[secreted CC::gfp] I; cup-5(ar465) III; smoc-1(jj65) V; sma-9(cc604) X</i>                                                              |
| LW2732                                                                         | <i>arls37[secreted CC::gfp] I; cup-5(ar465) III; smoc-1(jj85) V; sma-9(cc604) X</i>                                                              |
| LW2731                                                                         | <i>arls37[secreted CC::gfp] I; sma-4(jj70) cup-5(ar465) III; smoc-1(jj180) V; sma-9(cc604) X</i>                                                 |
| LW3874                                                                         | <i>arls37[secreted CC::gfp] I; cup-5(ar465) III; smoc-1(jj109) V; sma-9(cc604) X</i>                                                             |
| LW3927                                                                         | <i>arls37[secreted CC::gfp] I; cup-5(ar465) III; smoc-1(jj115) V; sma-9(cc604) X</i>                                                             |
| LW3906                                                                         | <i>arls37[secreted CC::gfp] I; cup-5(ar465) III; smoc-1(jj139) V; sma-9(cc604) X</i>                                                             |
| <b>Strains with different <i>smoc-1</i> alleles</b>                            |                                                                                                                                                  |
| LW4477                                                                         | <i>smoc-1(tm7000) V [6x outcrossed, isolate 3.23]</i>                                                                                            |
| LW4478                                                                         | <i>smoc-1(tm7000) V [6x outcrossed, isolate 4.5]</i>                                                                                             |
| LW4479                                                                         | <i>smoc-1(tm7125) V [6x outcrossed, isolate 5.2]</i>                                                                                             |
| LW4480                                                                         | <i>smoc-1(tm7125) V [6x outcrossed, isolate 7.24]</i>                                                                                            |
| LW4766                                                                         | <i>smoc-1(jj65) V [5x outcrossed, isolate 2.13]</i>                                                                                              |
| LW4487                                                                         | <i>smoc-1(jj85) V [3x outcrossed, isolate 1.13]</i>                                                                                              |
| LW4555                                                                         | <i>smoc-1(jj180) V [5x outcrossed, isolate 5.4]</i>                                                                                              |
| LW4556                                                                         | <i>smoc-1(jj180) V [5x outcrossed, isolate 5.8]</i>                                                                                              |
| LW5623                                                                         | <i>smoc-1(jj115) V [3x outcrossed, isolate 3.5]</i>                                                                                              |
| LW5624                                                                         | <i>smoc-1(jj115) V [3x outcrossed, isolate 13.3]</i>                                                                                             |
| LW5129                                                                         | <i>jjls5119[pMSD4.4(smoc-1p::smoc-1 cDNA:: smoc-1 3'UTR)+pCFJ90(myo-2p::mCherry)]<br/>1 3x outcrossed, isolate 1.3, also known as smoc-1(OE)</i> |
| LW5130                                                                         | <i>jjls5119[pMSD4.4(smoc-1p::smoc-1 cDNA:: smoc-1 3'UTR)+pCFJ90(myo-2p::mCherry)]<br/>1 3x outcrossed, isolate 2.5, also known as smoc-1(OE)</i> |
| <b>Strains for examining the M lineage phenotypes of <i>smoc-1</i> mutants</b> |                                                                                                                                                  |
| LW0081                                                                         | <i>ccls4438 [intrinsic CC::gfp] III; ayls2[egl-15p::gfp] IV; ayls6[hlh-8p::gfp] X</i>                                                            |
| LW4420                                                                         | <i>ccls4438[intrinsic CC::gfp] III; ayls2[egl-15p::gfp] IV; smoc-1(tm7000) V; ayls6[hlh-8p::gfp] X</i>                                           |
| LW4422                                                                         | <i>ccls4438[intrinsic CC::gfp] III; ayls2[egl-15p::gfp] IV; smoc-1(tm7125) V; ayls6[hlh-8p::gfp] X</i>                                           |
| LW4442                                                                         | <i>arls37[secreted CC::gfp] I; ccls4438[intrinsic CC::gfp] III; ayls2[egl-15p::gfp] IV; smoc-1(tm7125) V; sma-9(cc604) ayls6[hlh-8p::gfp] X</i>  |
| LW4443                                                                         | <i>arls37[secreted CC::gfp] I; ccls4438[intrinsic CC::gfp] III; ayls2[egl-15p::gfp] IV; smoc-1(tm7000) V; sma-9(cc604) ayls6[hlh-8p::gfp] X</i>  |
| LW4457                                                                         | <i>arls37[secreted CC::gfp] I; smoc-1(jj180) V; sma-9(cc604) X</i>                                                                               |

LW4834 *arls37[secreted CC::gfp] I; ccls4438[intrinsic CC::gfp] III; smoc-1(tm7125) V; sma-9(cc604) ayls6[hlh-8p::gfp] X*

---

#### **Strains carrying RAD-SMAD reporter**

---

LW2433 *jjls2433[pCXT51(5\*RLR::deleted pes-10p::gfp) + LiuFD61(mec-7p::rfp)] X, isolate 1, also known as RAD-SMAD reporter*

LW3467 *dbl-1(wk70) V; jjls2433[RAD-SMAD] X*

LW3468 *lon-2(e678) jjls2433[RAD-SMAD] X*

LW5604 *jjls5119[smoc-1(OE)] I; jjls2433[RAD-SMAD] X, isolate 1*

LW5605 *jjls5119[smoc-1(OE)] I; jjls2433[RAD-SMAD] X, isolate 2*

---

#### **Strains for body size measurement**

---

LW1856 *sma-6(jj1) II*

LW5498 *sma-3(tm4625) III [4x outcrossed, isolate 8.3]*

LW5499 *sma-3(tm4625) III [4x outcrossed, isolate 8.6]*

LW3346 *sma-3(jj3) III*

LW4774 *dbl-1(ok3749) V*

LW3471 *lon-2(e678) X*

LW4703 *sma-6(jj1) II; smoc-1(tm7125) V, isolate 9.3.1*

LW4704 *sma-6(jj1) II; smoc-1(tm7125) V, isolate 9.6.1*

LW4590 *sma-3(jj3) III; smoc-1(tm7125) V, isolate 13.12*

LW4595 *sma-3(jj3) III; smoc-1(tm7125) V, isolate 5.9.5*

LW5344 *dbl-1(ok3749) smoc-1(tm7125) V, isolate 1.1.1*

LW5345 *dbl-1(ok3749) smoc-1(tm7125) V, isolate 4.7.8*

LW4617 *smoc-1(tm7125) V; lon-2(e678) X, isolate 6.10.3.6*

LW4618 *smoc-1(tm7125) V; lon-2(e678) X, isolate 6.7.3.7*

LW5241 *jjls5119[smoc-1(OE)] I; dbl-1(ok3749) V, isolate 2.17*

LW5263 *jjls5119[smoc-1(OE)] I; dbl-1(ok3749) V, isolate 3.11*

LW5621 *jjls5119[smoc-1(OE)] I; sma-3(tm4625) III, isolate 1.2*

LW5622 *jjls5119[smoc-1(OE)] I; sma-3(tm4625) III, isolate 2.3*

LW5294 *jjls5119[smoc-1(OE)] I; lon-2(e678) X, isolate 5*

LW5295 *jjls5119[smoc-1(OE)] I; lon-2(e678) X, isolate 6*

---

#### **Strains for assaying the dauer phenotype**

---

DR40 *daf-1(m40) IV*

DR609 *daf-1(m213) IV*

CB1372 *daf-7(e1372) III*

LW5288 *daf-1(m40) IV; smoc-1(tm7125) V isolate 7.11B*

LW5289 *daf-1(m40) IV; smoc-1(tm7125) V isolate 16.16B*

LW5286 *daf-1(m213) IV; smoc-1(tm7125) V isolate 2.4*  
LW5287 *daf-1(m213) IV; smoc-1(tm7125) V isolate 2.8*  
LW5290 *daf-7(e1372) III; smoc-1(tm7125) V isolate 6.12*  
LW5306 *daf-7(e1372) III; smoc-1(tm7125) V isolate 6.6*  
LW5291 *daf-1(m213) IV; lon-2(e678) X isolate 2.3*  
LW5292 *daf-1(m213) IV; lon-2(e678) X isolate 2.4*  
LW5293 *daf-7(e1372) III; lon-2(e678) X isolate 6*  
LW5285 *daf-7(e1372) III; lon-2(e678) X isolate 15*

---

**Strains carrying the *smoc-1* reporter constructs**

---

LW4688 *jjls4688[pJKL1139.2(smoc-1p::4xnl::gfp::unc-54 3'UTR)+pRF4] I or IV, 3x outcrossed, isolate 13.1*  
LW4694 *jjls4694[pJKL1139.2(smoc-1p::4xnl::gfp::unc-54 3'UTR)+pRF4] V, 3x outcrossed, isolate 19.1*  
LW4764 *sma-3(jj3) III; jjls4688[pJKL1139.2(smoc-1p::4xnl::gfp::unc-54 3'UTR)+pRF4] I or IV, isolate 3.2*  
LW4765 *sma-3(jj3) III; jjls4688[pJKL1139.2(smoc-1p::4xnl::gfp::unc-54 3'UTR)+pRF4] I or IV, isolate 9.3*  
LW4724 *sma-6(jj1) II; jjls4688[pJKL1139.2(smoc-1p::4xnl::gfp::unc-54 3'UTR)+pRF4] I or IV, isolate 11.4.2*  
LW4725 *sma-6(jj1) II; jjls4688[pJKL1139.2(smoc-1p::4xnl::gfp::unc-54 3'UTR)+pRF4] I or IV, isolate 11.7.2*  
LW4728 *jjls4688[pJKL1139.2(smoc-1p::4xnl::gfp::unc-54 3'UTR)+pRF4] I or IV; lon-2(e678), isolate 1.3.1*  
LW4729 *jjls4688[pJKL1139.2(smoc-1p::4xnl::gfp::unc-54 3'UTR)+pRF4] I or IV; lon-2(e678), isolate 2.1.2*  
LW5520 *jjls4688[pJKL1139.2(smoc-1p::4xnl::gfp::unc-54 3'UTR)+pRF4] I or IV; smoc-1(tm7125) V, isolate 1.7*  
LW5521 *jjls4688[pJKL1139.2(smoc-1p::4xnl::gfp::unc-54 3'UTR)+pRF4] I or IV; smoc-1(tm7125) V, isolate 2.5*  
LW4878 *jjls3900[pJKL1066.3(hlh-8p::nls::mCherry::lacZ)+ pCFJ90(myo-2p::mCherry)] IV; jjls4694[pJKL1139.2(smoc-1p::4xnl::gfp::unc-54 3'UTR)+pRF4] V, isolate 1.2*  
LW4879 *jjls3900[pJKL1066.3(hlh-8p::nls::mCherry::lacZ)+ pCFJ90(myo-2p::mCherry)] IV; jjls4694[pJKL1139.2(smoc-1p::4xnl::gfp::unc-54 3'UTR)+pRF4] V, isolate 2.4*  
LW5656 *jjEx5656[pJKL1201(5kb smoc-1p::4xnl::gfp::unc-54 3'UTR)+pRF4]*  
LW5657 *jjEx5657[pJKL1201(5kb smoc-1p::4xnl::gfp::unc-54 3'UTR)+pRF4]*  
LW5658 *jjEx5658[pJKL1202(5kb smoc-1p::4xnl::gfp::2kb smoc-1 3'UTR)+pRF4]*  
LW5659 *jjEx5658[pJKL1202(5kb smoc-1p::4xnl::gfp::2kb smoc-1 3'UTR)+pRF4]*

**Table 2. Plasmid constructs generated in this study.**

| <b>Plasmid name</b>                                          | <b>Construct information</b>                             |                    |
|--------------------------------------------------------------|----------------------------------------------------------|--------------------|
| <b>Translational and transcriptional reporter constructs</b> |                                                          |                    |
| pJKL1128                                                     | <i>2kb smoc-1p::smoc-1 genomic::2kb smoc-1 3'UTR</i>     |                    |
| pMSD4                                                        | <i>2kb smoc-1p::smoc-1 cDNA::2kb smoc-1 3'UTR</i>        |                    |
| pJKL1138                                                     | <i>2kb smoc-1p::smoc-1 cDNA::unc-54 3'UTR</i>            |                    |
| pJKL1139                                                     | <i>2kb smoc-1p::4xnl::gfp::unc-54 3'UTR</i>              |                    |
| pJKL1201                                                     | <i>5kb smoc-1p::4xnl::gfp::unc-54 3'UTR</i>              |                    |
| pJKL1202                                                     | <i>5kb smoc-1p::4xnl::gfp::2kb smoc-1 3'UTR</i>          |                    |
| <b>Tissue specific expression constructs</b>                 |                                                          |                    |
| pJKL1137                                                     | <i>hlh-8p::smoc-1 cDNA::unc-54 3'UTR</i>                 | M lineage          |
| pJKL1136                                                     | <i>hlh-8p::smoc-1 cDNA-S103P::unc-54 3'UTR</i>           | M lineage          |
| pMSD6                                                        | <i>elt-3p::smoc-1 cDNA::unc-54 3'UTR</i>                 | hypodermis         |
| pMSD7                                                        | <i>myo-2p::smoc-1 cDNA::unc-54 3'UTR</i>                 | pharyngeal muscles |
| pMSD8                                                        | <i>myo-3p::smoc-1 cDNA::unc-54 3'UTR</i>                 | body wall muscles  |
| pMSD9                                                        | <i>rab-3p::smoc-1 cDNA::unc-54 3'UTR</i>                 | pan neurons        |
| pMSD18                                                       | <i>ifb-2p::smoc-1 cDNA::unc-54 3'UTR</i>                 | intestine          |
| <b>Constructs to express human SMOC genes</b>                |                                                          |                    |
| pJKL1150                                                     | <i>2kb smoc-1p::huSMOC1 ORF::smoc-1 3'UTR</i>            |                    |
| pJKL1151                                                     | <i>2kb smoc-1p::huSMOC2 ORF::smoc-1 3'UTR</i>            |                    |
| pJKL1178                                                     | <i>2kb smoc-1p::CelSP::huSMOC1 chimera::unc-54 3'UTR</i> |                    |
| pJKL1179                                                     | <i>2kb smoc-1p::CelSP::huSMOC2 chimera::unc-54 3'UTR</i> |                    |

**Table 3. Mutations in *smoc-1* suppress the *sma-9(0)* M lineage defects.**

| Genotype                                                                                       | Susm penetrance <sup>a</sup><br>(# of animals examined) |
|------------------------------------------------------------------------------------------------|---------------------------------------------------------|
| <i>sma-9(cc604)</i>                                                                            | --                                                      |
| <i>smoc-1(jj65); sma-9(cc604)</i>                                                              | 84% (N=255) <sup>b</sup>                                |
| <i>smoc-1(jj85); sma-9(cc604)</i>                                                              | 78% (N=240) <sup>b</sup>                                |
| <i>smoc-1(jj180); sma-4(jj70); sma-9(cc604)</i>                                                | 98% (N=80) <sup>b,c</sup>                               |
| <i>smoc-1(jj180); sma-9(cc604)</i>                                                             | 98% (N=319) <sup>c</sup>                                |
| <i>sma-4(jj70); sma-9(cc604)</i>                                                               | 0% (N>100) <sup>c</sup>                                 |
| <i>sma-4(e729); sma-9(cc604)</i>                                                               | 100% (N=61) <sup>d</sup>                                |
| <i>smoc-1(tm7000); sma-9(cc604)</i>                                                            | 97% (N=134)                                             |
| <i>smoc-1(tm7125); sma-9(cc604)</i>                                                            | 98% (N=686)                                             |
| <i>smoc-1(tm7000)/jj65 or +/jj65; sma-9(cc604)</i>                                             | 67% (N=51) <sup>e</sup>                                 |
| <i>smoc-1(tm7000)/jj85 or +/jj85; sma-9(cc604)</i>                                             | 46% (N=24) <sup>e</sup>                                 |
| <i>smoc-1(tm7000)/jj180 or +/jj180; sma-9(cc604)</i>                                           | 58% (N=26) <sup>e</sup>                                 |
| <i>smoc-1(jj109); sma-9(cc604)</i>                                                             | 99% (N=107)                                             |
| <i>smoc-1(jj115); sma-9(cc604)</i>                                                             | 100% (N=95)                                             |
| <i>smoc-1(jj139); sma-9(cc604)</i>                                                             | 100% (N=128)                                            |
| <i>smoc-1(tm7125); sma-9(cc604); jjEx4490[smoc-1p::smoc-1 genomic::smoc-1 3'UTR], line 1</i>   | 32% (N=111)                                             |
| <i>smoc-1(tm7125); sma-9(cc604); jjEx4491[smoc-1p::smoc-1 genomic::smoc-1 3'UTR], line 2</i>   | 26% (N=101)                                             |
| <i>smoc-1(tm7125); sma-9(cc604); jjEx4810[smoc-1p::smoc-1 cDNA::smoc-1 3'UTR], line 1</i>      | 2% (N=278)                                              |
| <i>smoc-1(tm7125); sma-9(cc604); jjEx4811[smoc-1p::smoc-1 cDNA::smoc-1 3'UTR], line 2</i>      | 1% (N=498)                                              |
| <i>smoc-1(tm7125); sma-9(cc604); jjEx4812[smoc-1p::smoc-1 cDNA::unc-54 3'UTR], line 1</i>      | 17% (N=481)                                             |
| <i>smoc-1(tm7125); sma-9(cc604); jjEx4813[smoc-1p::smoc-1 cDNA::unc-54 3'UTR], line 2</i>      | 23% (N=792)                                             |
| <i>smoc-1(tm7125); sma-9(cc604); jjEx4650[h1h-8p::smoc-1 cDNA::unc-54 3'UTR], line 1</i>       | 15% (N=186)                                             |
| <i>smoc-1(tm7125); sma-9(cc604); jjEx4612[h1h-8p::smoc-1 cDNA::unc-54 3'UTR], line 3</i>       | 17% (N=214)                                             |
| <i>smoc-1(tm7125); sma-9(cc604); jjEx4620[h1h-8p::smoc-1 cDNA-S103P::unc-54 3'UTR], line 1</i> | 86% (N=95)                                              |
| <i>smoc-1(tm7125); sma-9(cc604); jjEx4674[h1h-8p::smoc-1 cDNA-S103P::unc-54 3'UTR], line 2</i> | 92% (N=100)                                             |

<sup>a</sup> The Susm penetrance refers to the percent of animals with 1-2 M-derived CCs as scored by the *CC::GFP* reporter.

<sup>b</sup> Data taken from (LIU *et al.* 2015).

<sup>c</sup> The *jj70* strain described in our previous publication (LIU *et al.* 2015) carries a mutation in *sma-4*(S110L), as well as a mutation in *smoc-1*(Q180Stop). To avoid confusion, we have designated the *sma-4* mutation as *jj70*, and the mutation in *smoc-1* as *jj180*. As shown here, *sma-4*(*jj70*) failed to suppress *sma-9*(0), while *smoc-1*(*jj180*) suppressed *sma-9*(0).

<sup>d</sup> Data taken from (FOEHR *et al.* 2006).

<sup>e</sup> Complementation tests were performed by crossing *tm7000/+; cc604* males with *jj65* (*jj85* or *jj180*); *cc604* hermaphrodites and scoring the cross progeny for the number of CCs. All progeny would have 4 CCs if the tested alleles complemented each other, while ~50% of the progeny would have 6 CCs if the tested alleles failed to complement each other. The partial dominance of each of the *jj* alleles tested (LIU *et al.* 2015) may have contributed to the observed percentage being slightly above 50%.



**Table 4. SMOC-1 does not play a significant role in the TGF $\beta$  dauer pathway.**

| Genotype                               | 15°C<br>% Daf-c (n)   | 20°C<br>% Daf-c (n)     | 25°C<br>% Daf-c (n)   |
|----------------------------------------|-----------------------|-------------------------|-----------------------|
| <i>smoc-1(tm7125)</i>                  | 0 (858)               | 0 (828)                 | 0 (863)               |
| <i>jJls5119[smoc-1(OE)]</i>            | 0 (541)               | 0 (792)                 | 0 (574)               |
| <i>daf-7(e1372)</i>                    | 30.2 $\pm$ 4.5 (348)  | 92.8 $\pm$ 2.9 (794)    | 99.8 $\pm$ 0.3 (954)  |
| <i>daf-7(e1372); smoc-1(tm7125) #1</i> | 33.8 $\pm$ 14.8 (142) | 82.5 $\pm$ 9.3 (748)*   | 99.6 $\pm$ 0.3 (1102) |
| <i>daf-7(e1372); smoc-1(tm7125) #2</i> | 26.4 $\pm$ 7.7 (148)  | 72.0 $\pm$ 8.3 (343)*   | 100 (1115)            |
| <i>daf-1(m40)</i>                      | 0 (485)               | 44.9 $\pm$ 7.4 (1059)   | 100 (964)             |
| <i>daf-1(m40); smoc-1(tm7125) #1</i>   | 0 (589)               | 57.2 $\pm$ 16.4 (1567)* | 99.9 $\pm$ 0.2 (970)  |
| <i>daf-1(m40); smoc-1(tm7125) #2</i>   | 0 (483)               | 24.0 $\pm$ 8.8 (721)*   | 100 (518)             |
| <i>daf-1(m213)</i>                     | 0 (469)               | 99.4 $\pm$ 0.6 (867)    | 100 (1174)            |
| <i>daf-1(m213); smoc-1(tm7125) #1</i>  | 0 (603)               | 98.2 $\pm$ 3.1 (649)    | 100 (719)             |
| <i>daf-1(m213); smoc-1(tm7125) #2</i>  | 0 (544)               | 99.4 $\pm$ 0.5 (676)    | 100 (378)             |

n: number of worms scored at each temperature; from a total of 5 plates per genotype assayed at each condition. For each double mutant combination, two independent isolates (#1 and #2) were examined.

% Daf-c: mean dauer formation percentage  $\pm$  standard deviation.

\*:  $p < 0.05$ , as calculated by an ANOVA and TukeyHSD, between double mutant and the corresponding *daf* single mutant at the specified temperature.

**Table 5. LON-2 does not play a significant role in the TGF $\beta$  dauer pathway.**

| Genotype                            | 15°C<br>% Daf-c (n)   | 20°C<br>% Daf-c (n)    | 25°C<br>% Daf-c (n) |
|-------------------------------------|-----------------------|------------------------|---------------------|
| <i>lon-2(e678)</i>                  | 0 (807)               | 0 (799)                | 0 (1090)            |
| <i>daf-7(e1372)</i>                 | 22.7 $\pm$ 32.1 (141) | 83.3 $\pm$ 6.5 (257)   | 100 (357)           |
| <i>daf-7(e1372); lon-2(e678)</i> #1 | 25.3 $\pm$ 8.7 (435)  | 59.4 $\pm$ 16.4 (239)* | 100 (749)           |
| <i>daf-7(e1372); lon-2(e678)</i> #2 | 31.7 $\pm$ 4.8 (249)  | 66.7 $\pm$ 11.7 (426)  | 100 (840)           |
| <i>daf-1(m213)</i>                  | 0.3 $\pm$ 1.0 (313)   | 97.9 $\pm$ 26.0 (570)  | 100 (853)           |
| <i>daf-1(m213); lon-2(e678)</i> #1  | 0.2 $\pm$ 0.3 (575)   | 92.1 $\pm$ 2.9 (643)   | 100 (1149)          |
| <i>daf-1(m213); lon-2(e678)</i> #2  | 0.5 $\pm$ 0.8 (654)   | 77.7 $\pm$ 5.0 (515)   | 100 (832)           |

n: number of worms scored at each temperature; from a total of 5 plates per genotype assayed at each condition. For each double mutant combination, two independent isolates (#1 and #2) were examined.

% Daf-c: mean dauer formation percentage  $\pm$  standard deviation.

\*:  $p < 0.05$ , as calculated by an ANOVA and TukeyHSD, between double mutant and the corresponding *daf* single mutant at the specified temperature.

## A The *C. elegans* BMP pathway

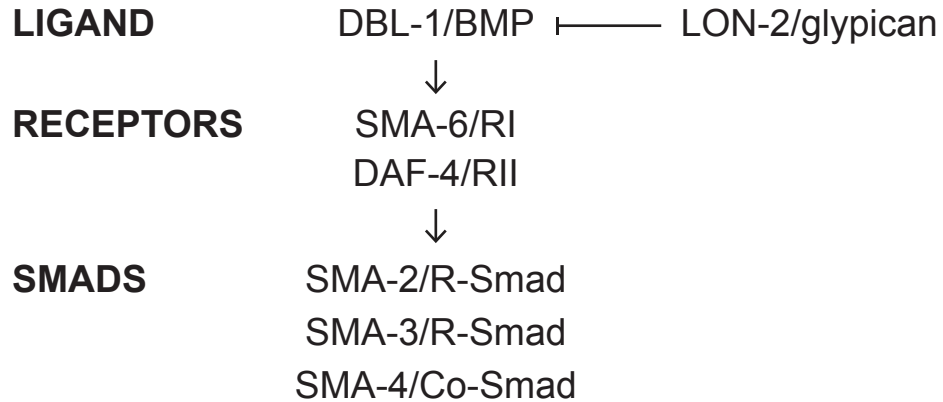

B

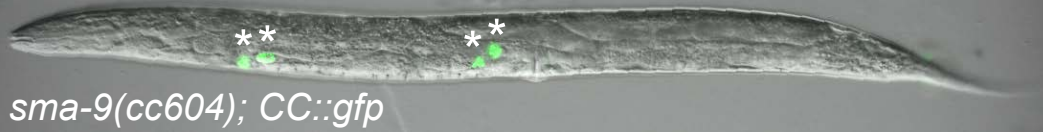

C

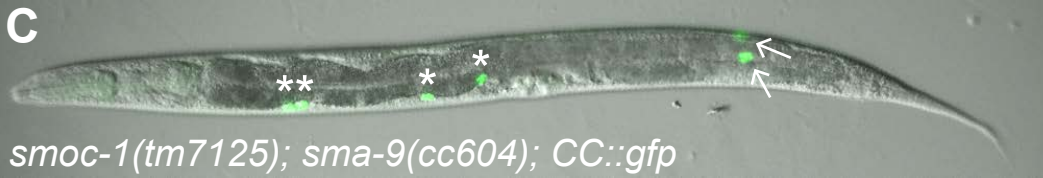

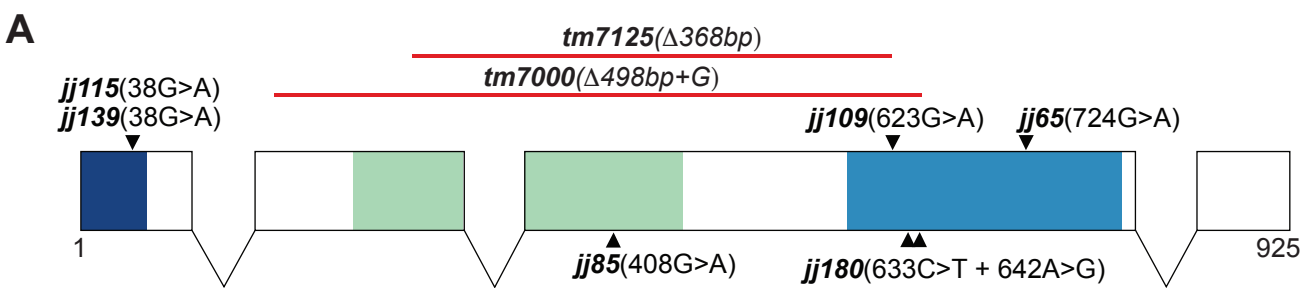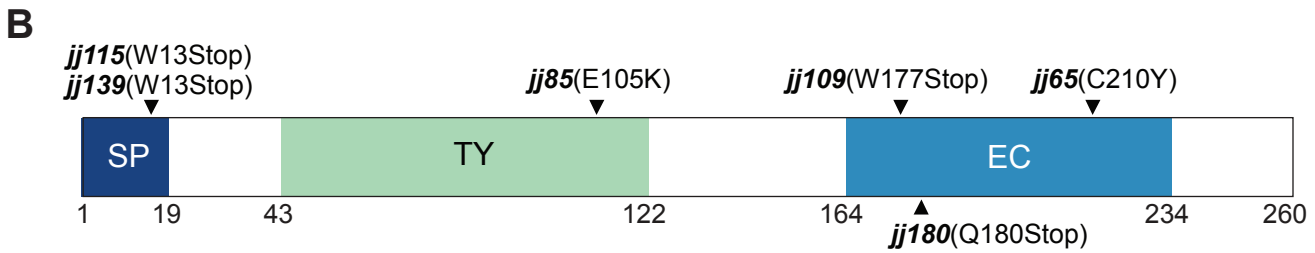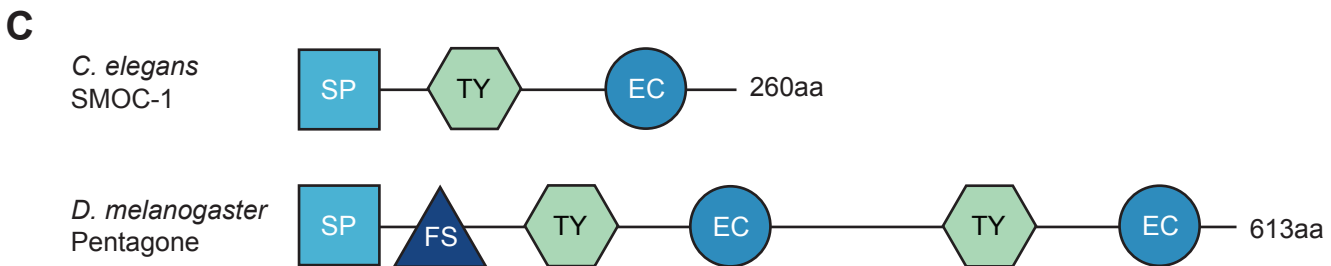

bioRxiv preprint doi: <https://doi.org/10.1101/416669>; this version posted September 13, 2018. The copyright holder for this preprint (which was not certified by peer review) is the author/funder, who has granted bioRxiv a license to display the preprint in perpetuity. It is made available under aCC-BY-NC-ND 4.0 International license.

## D TY domain alignment

|              |     |                                                     |
|--------------|-----|-----------------------------------------------------|
| Ce_SMOC1_TY  | 53  | CASQRKALKRKTD-GDARIYIPTCSPKNSLLYDKVQCYDVS--IYCWCV   |
| Dm_Pent_TY1  | 80  | CLEAVKFAARROQER--DPGYFVPRCRKD-GN-FAAMOCYGNN--G-CWCS |
| Dm_Pent_TY2  | 396 | CWMDOSVTLEEOGHGGKSVLFVPOCLPD-GR-YORIQCYSSSTSTSYCWCV |
| Hs_SMOC1_TY1 | 95  | CRLERAQALEQAKK-PQEAVFVPECGED-GS-FTQVQCHTYT--GYCWCV  |
| Hs_SMOC1_TY2 | 227 | CDQERQSALEEAQQNPREGIVIPECAPG-GL-YKPVQCHQST--GYCWCV  |
| Hs_SMOC2_TY1 | 90  | CVAERKYTOEQARK-EFQQVFIPECND-DGT-YSOVQCHSYT--GYCWCV  |
| Hs_SMOC2_TY2 | 216 | CDQEHQSALEEAQPKNDNVVVIPECAPG-GL-YKPVQCHPST--GYCWCV  |

|              |     |                                  |     |
|--------------|-----|----------------------------------|-----|
| Ce_SMOC1_TY  | 100 | DELSGEPKLGSSSTRG-----KPKCE       | 120 |
| Dm_Pent_TY1  | 123 | DSQ-GRPIADDNKQFRKGLRCRANRRDRRLAS | 156 |
| Dm_Pent_TY2  | 444 | NEDTGKSIPGTSVKNK-----RPOCD       | 464 |
| Hs_SMOC1_TY1 | 140 | TPD-GKPISSSVQNK-----TPVCS        | 159 |
| Hs_SMOC1_TY2 | 273 | LVDTGRPLPGTSTRYV-----MPSCE       | 293 |
| Hs_SMOC2_TY1 | 135 | TPN-GRPISGTAVAHK-----TPRCP       | 154 |
| Hs_SMOC2_TY2 | 262 | LVDTGRPIPGTSTRYE-----QPKCD       | 282 |

S103P *jj85(E105K)*

## E EC domain alignment

|             |     |                                                   |
|-------------|-----|---------------------------------------------------|
| Ce_SMOC1_EC | 133 | RRNNRCKEKKRTFRRLVSTLKSEMIMSGINAT-----KV---        |
| Dm_Pent_EC1 | 177 | TAHRTCCKSDRSQFNINLMRMFRNEA-QSFFRQP-----SL---      |
| Dm_Pent_EC2 | 470 | RPMKGCTEPRKTOFLKELKAYLNTSLLPSSTTGS-----NSSMW      |
| Hs_SMOC1_EC | 310 | RELPGCPEGKKMEFITSLLDALTTDMVQAINSAAPTGGGRFSEPDPS-- |
| Hs_SMOC2_EC | 299 | ROLOGCPGAKKHEFLTSLVDALSTDMVHAASDPSS-SSGRLSEPDPS-- |

|             |     |                                                    |
|-------------|-----|----------------------------------------------------|
| Ce_SMOC1_EC | 169 | -SRDSAIRWKFNQLNINHNVLERSSEWKPFKSVLLEWKNVROCSRNLFK  |
| Dm_Pent_EC1 | 212 | -SDSHILEWQFSKLDTNGNKLDRQEIRELKKVLRRNVKPRRCGRTEFGK  |
| Dm_Pent_EC2 | 510 | TDDERAIATLSFVYLDKNKNKSWDRREWKNFRDLVTSASHLRRCGKKMPR |
| Hs_SMOC1_EC | 358 | TLEERVVHWYFSQLDSNSSNDINKREMPPFKRYVKKKAKPKKCARRFTD  |
| Hs_SMOC2_EC | 346 | TLEERVVHWYFKLLDKNSSGDIGKKEIKPFKRFLRKKS KPKKCVKKFVE |

*jj65(C210Y)*

|             |     |                               |     |
|-------------|-----|-------------------------------|-----|
| Ce_SMOC1_EC | 218 | CDLNKDRKLTDFEWRKCI VQEI NRVPK | 245 |
| Dm_Pent_EC1 | 261 | CDVTKDANLNWLEWSVCF TKEFHNSAV  | 288 |
| Dm_Pent_EC2 | 260 | CDVNGDKKISLAEWLNCL-QATPRESAT  | 586 |
| Hs_SMOC1_EC | 408 | CDLNKDKVISLPELKGCLGVSKGRL-V   | 434 |
| Hs_SMOC2_EC | 396 | CDVNNDKSISVQELMGCLGVAKEDGKAD  | 423 |

## F Nematode TY domain alignment

|           |   |                                                     |
|-----------|---|-----------------------------------------------------|
| Ce_SMOC1  | 1 | CASQRKALKRKTDGDA--RIYIPTCSPKNSLLYDKVQCYDVS IYCWCVD  |
| Cre_26999 | 1 | CASQRKALKRKTDGDA--RIYIPTCSPKNSLLYDKVQCYEVSAYCWCVD   |
| Cbn_20462 | 1 | CASQRKALKRKTDGDS--RIYIPTCSPKNSLLYDKIQCYDVSAYCWCVD   |
| Cbg_23276 | 1 | CASQRKALKRKTNGDS--RIYIPTCSPKNAALLYDKVQCYDVSAYCWCVD  |
| Cja_07338 | 1 | CASQQRKALNRKNAGDS--KIYVPTCSAKNSLLYDKVQCYDMSAYCWCVD  |
| Ppa_34808 | 1 | CEQARSDLKQMEGROS SSVAYLPOCDMRDES LYRRLQCHGKEV-CWCVD |

|           |    |                      |    |
|-----------|----|----------------------|----|
| Ce_SMOC1  | 49 | ELSGEPKLGSSSTRGKPKCE | 68 |
| Cre_26999 | 49 | ELSGEPKIGSSTSRGKPKCE | 68 |
| Cbn_20462 | 49 | ELSGEPKIGSSTSRGKPKCE | 68 |
| Cbg_23276 | 49 | ELSGEPKIGSSTSRGRPKCE | 68 |
| Cja_07338 | 49 | EISGEPKIGSSTSRGKPKCQ | 68 |
| Ppa_34808 | 50 | IVTGD PVTD-----ECE   | 61 |

S103P *jj85(E105K)*

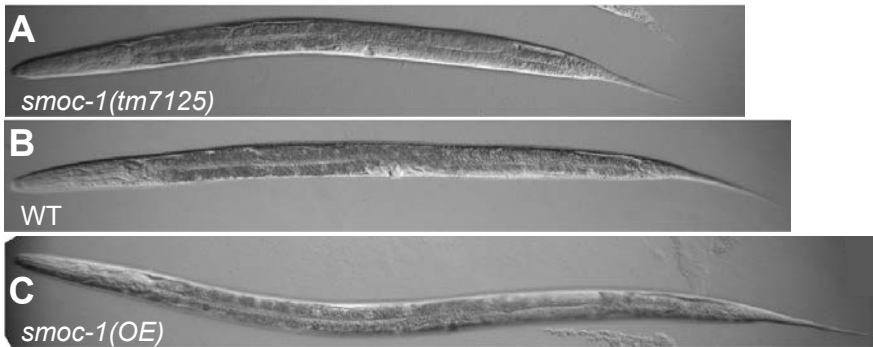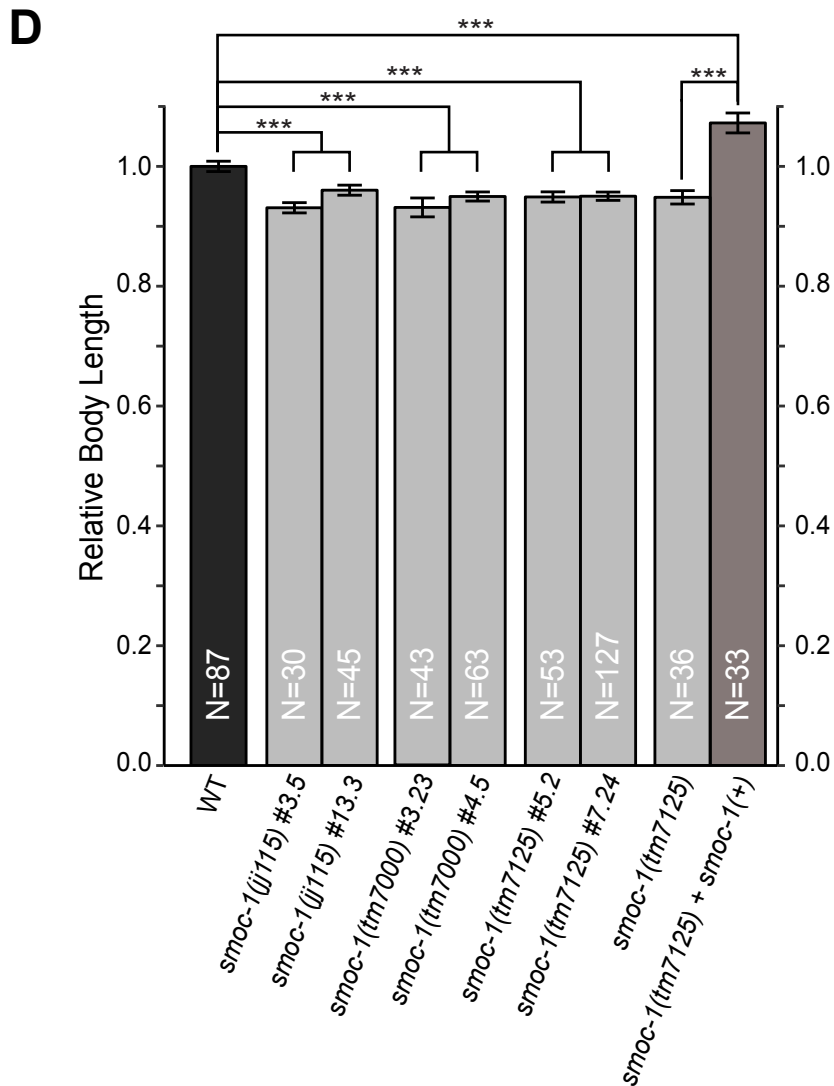

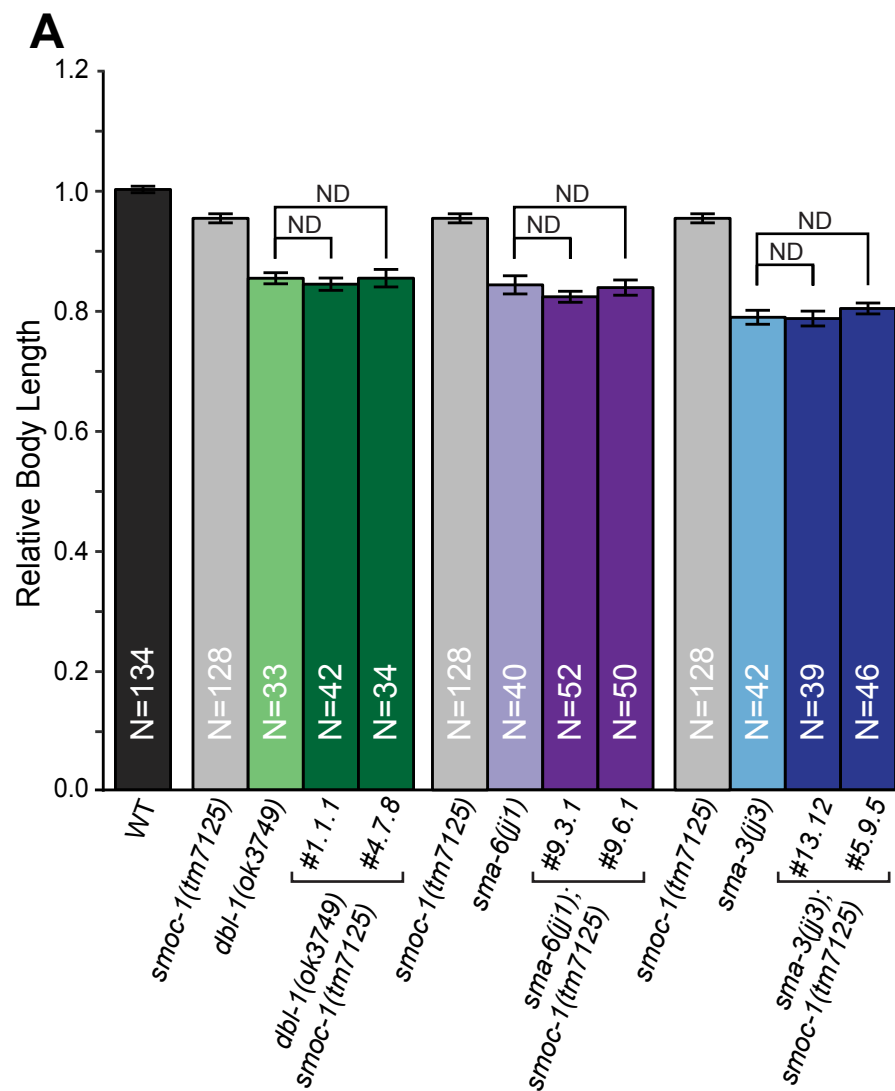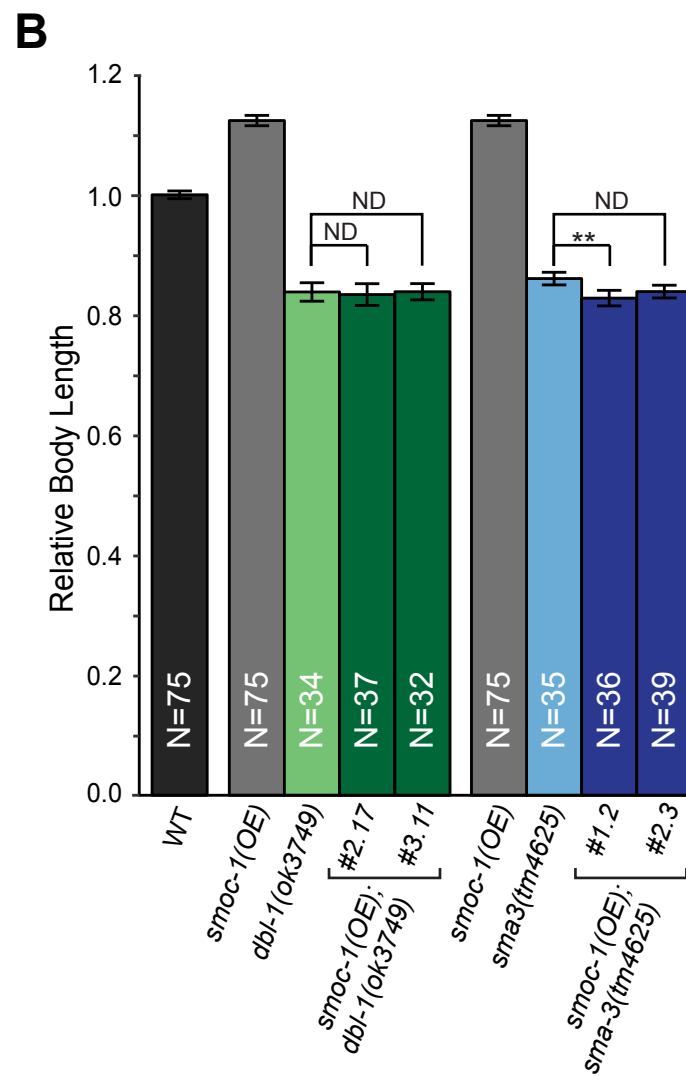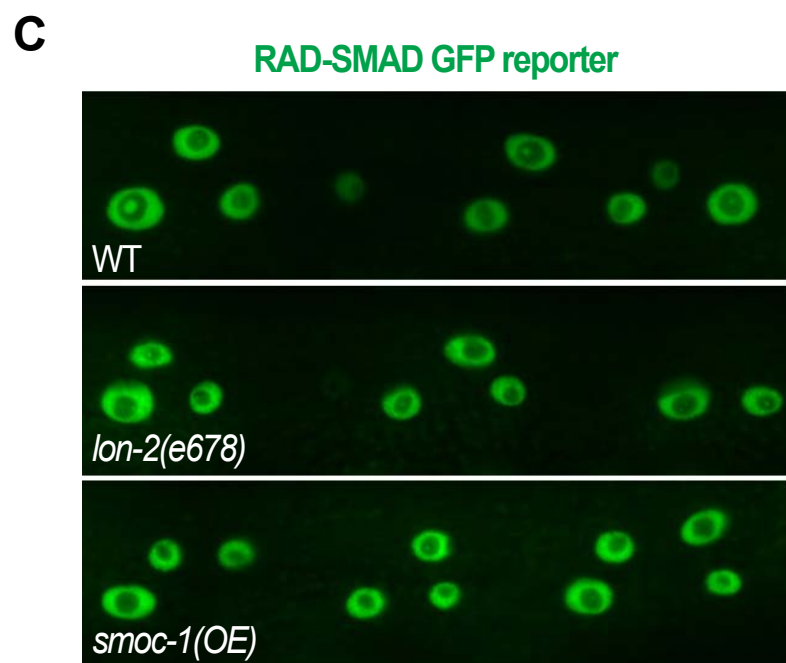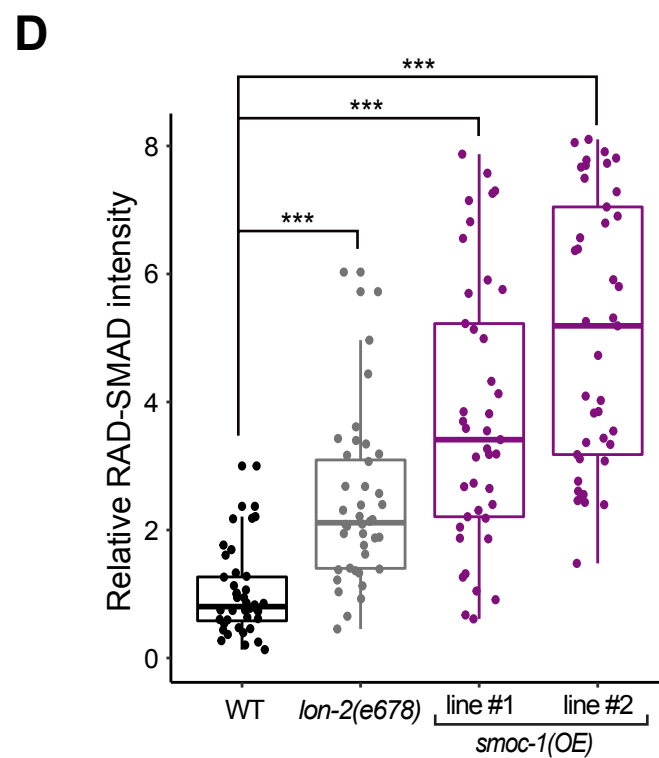

**A**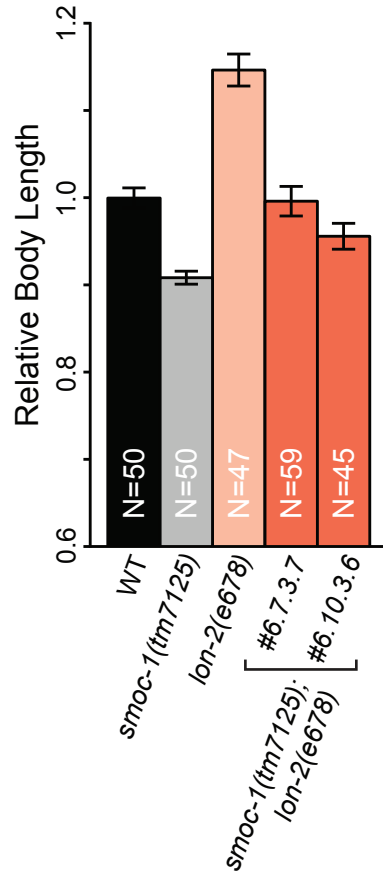**B**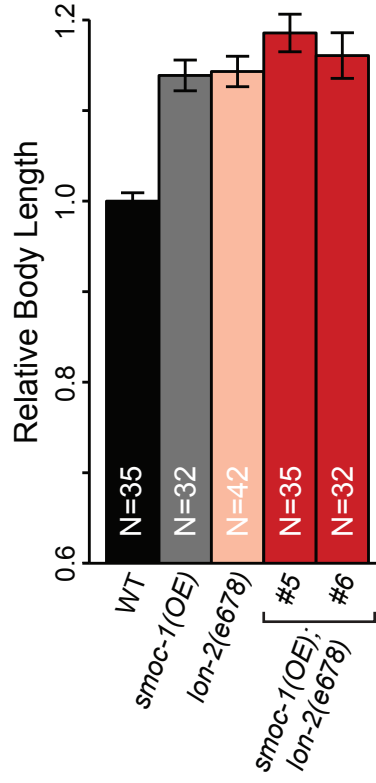

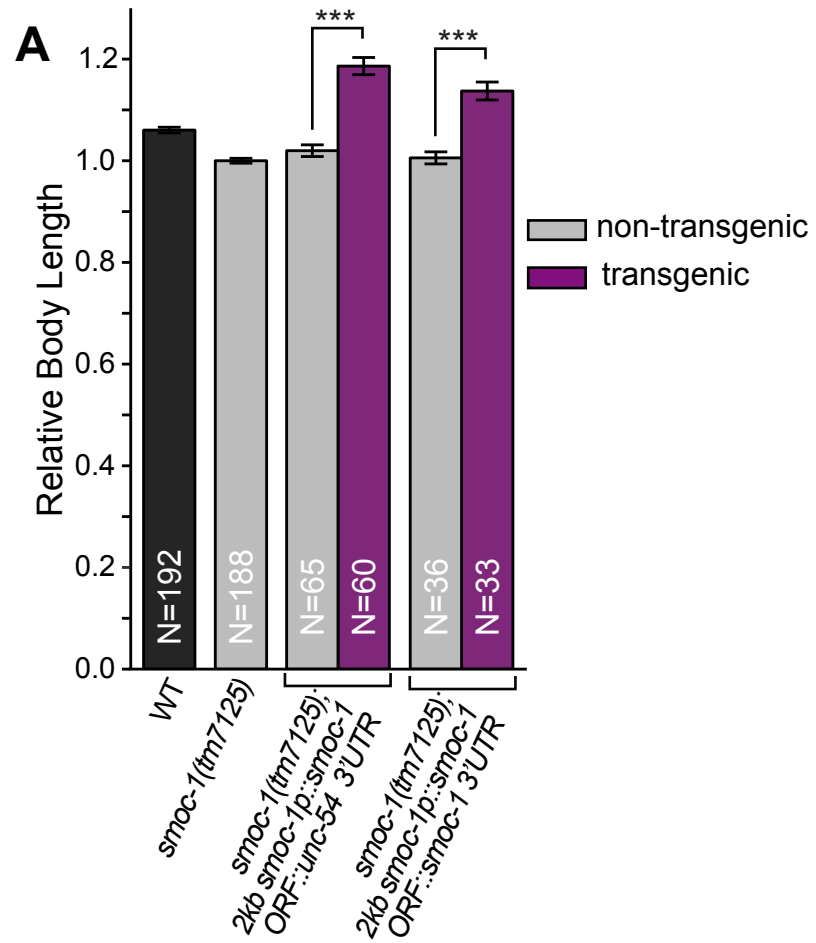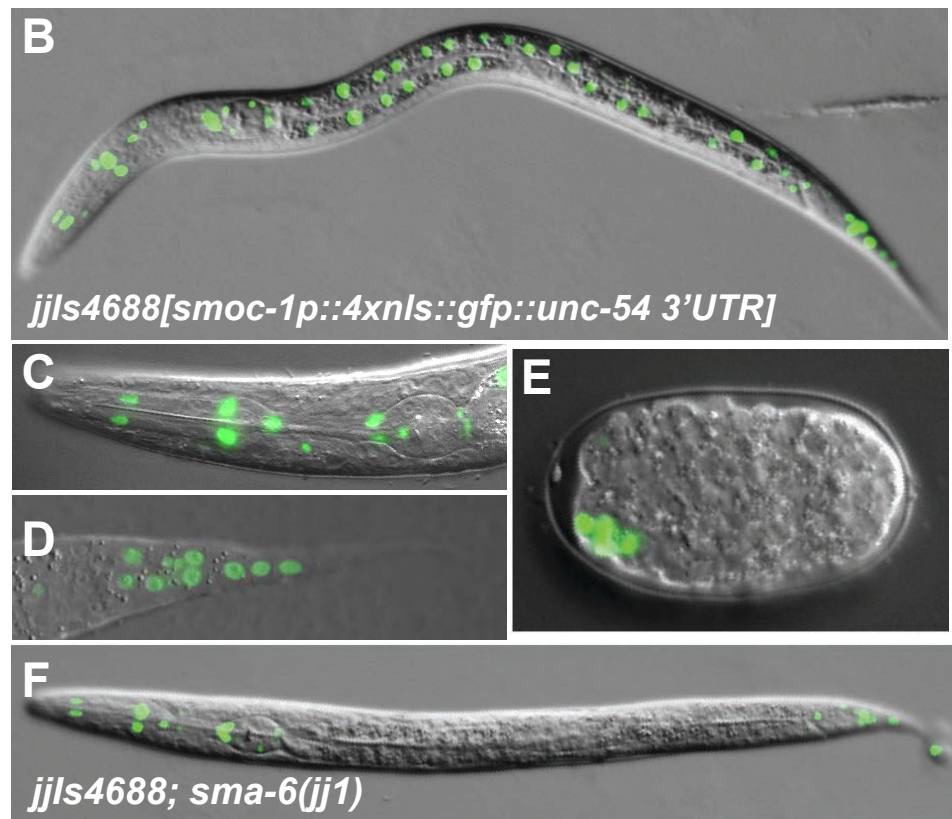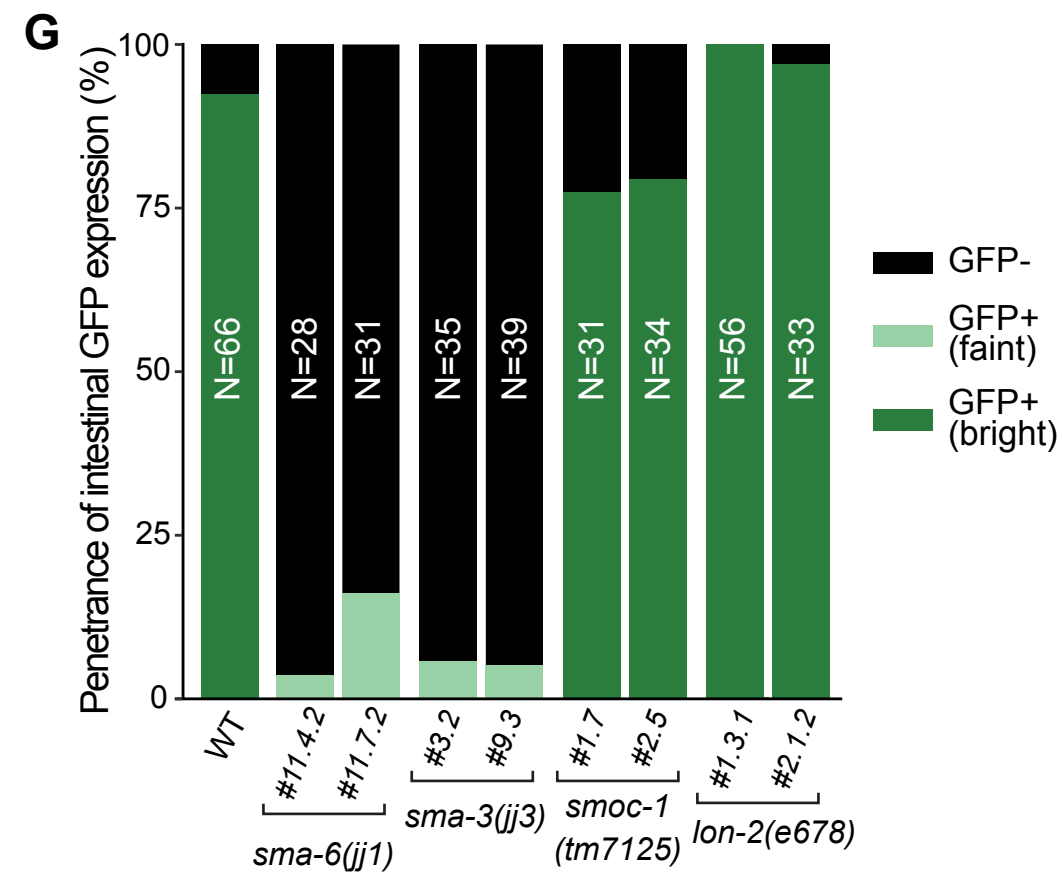



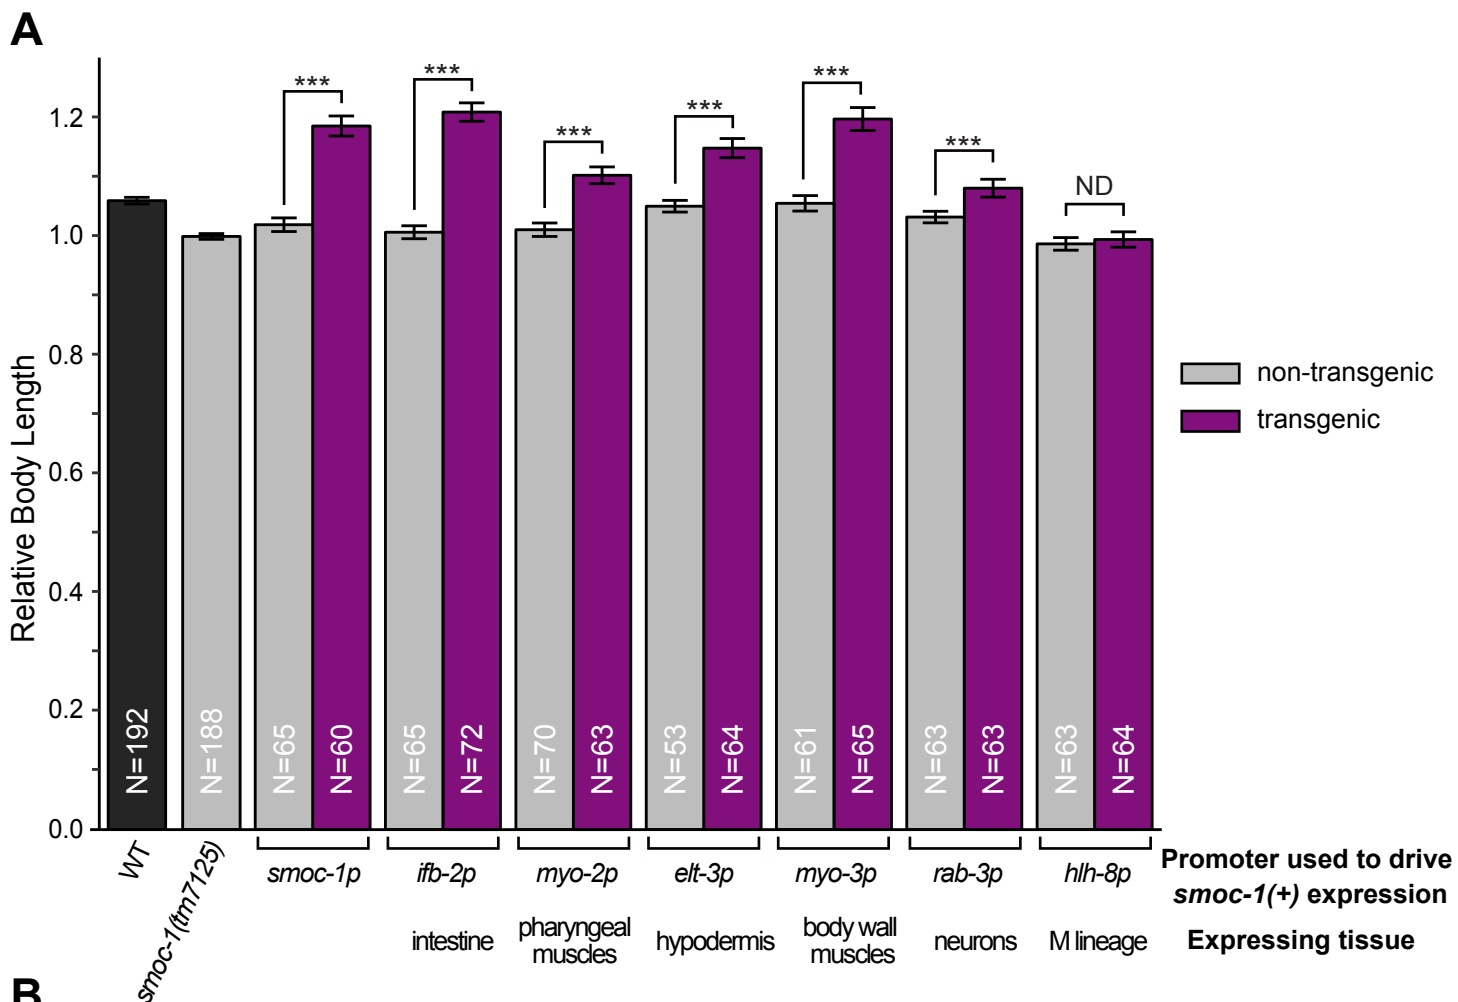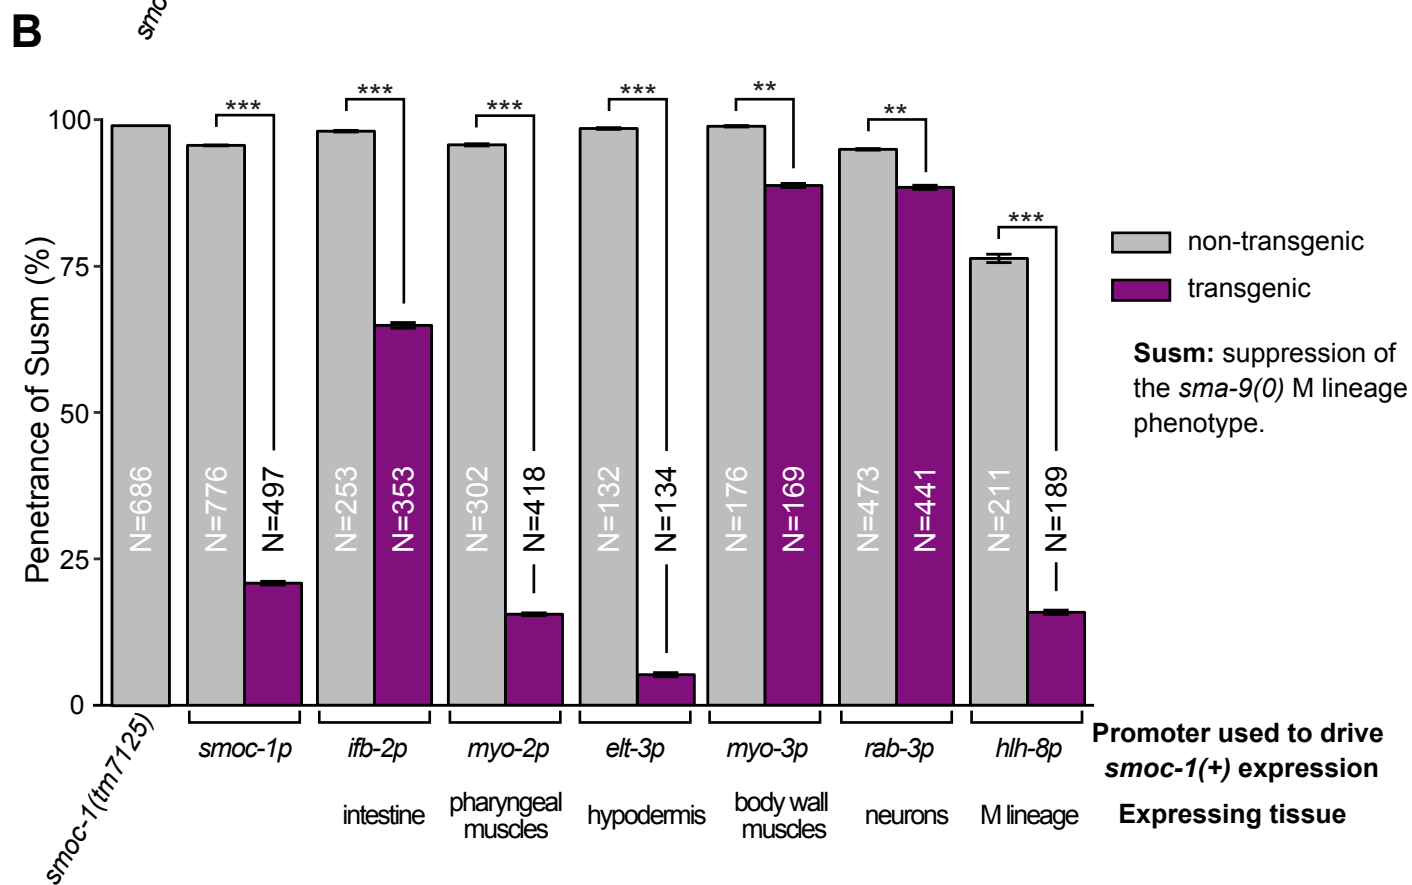

**A**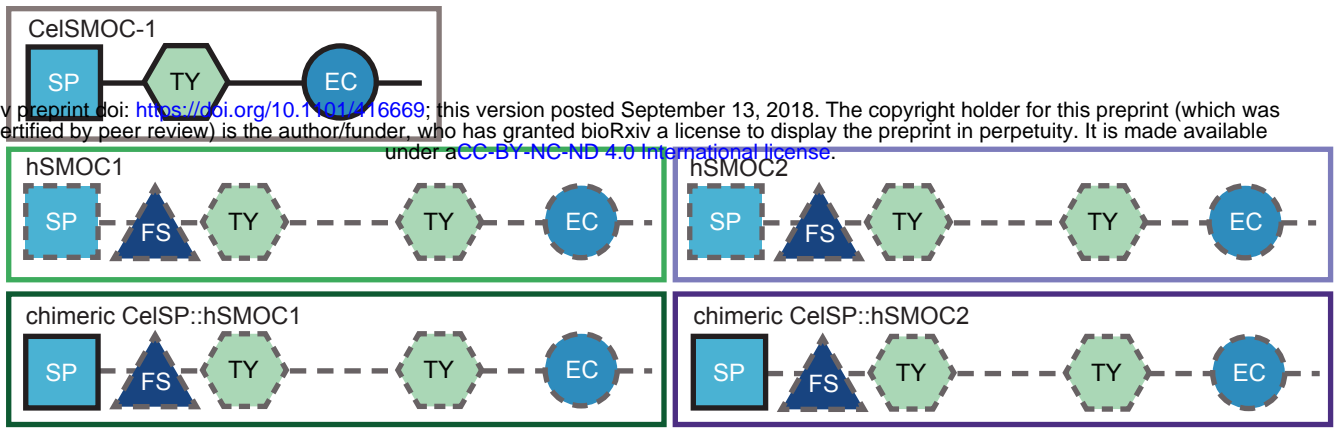

bioRxiv preprint doi: <https://doi.org/10.1101/416669>; this version posted September 13, 2018. The copyright holder for this preprint (which was not certified by peer review) is the author/funder, who has granted bioRxiv a license to display the preprint in perpetuity. It is made available under aCC-BY-NC-ND 4.0 International license.

**B**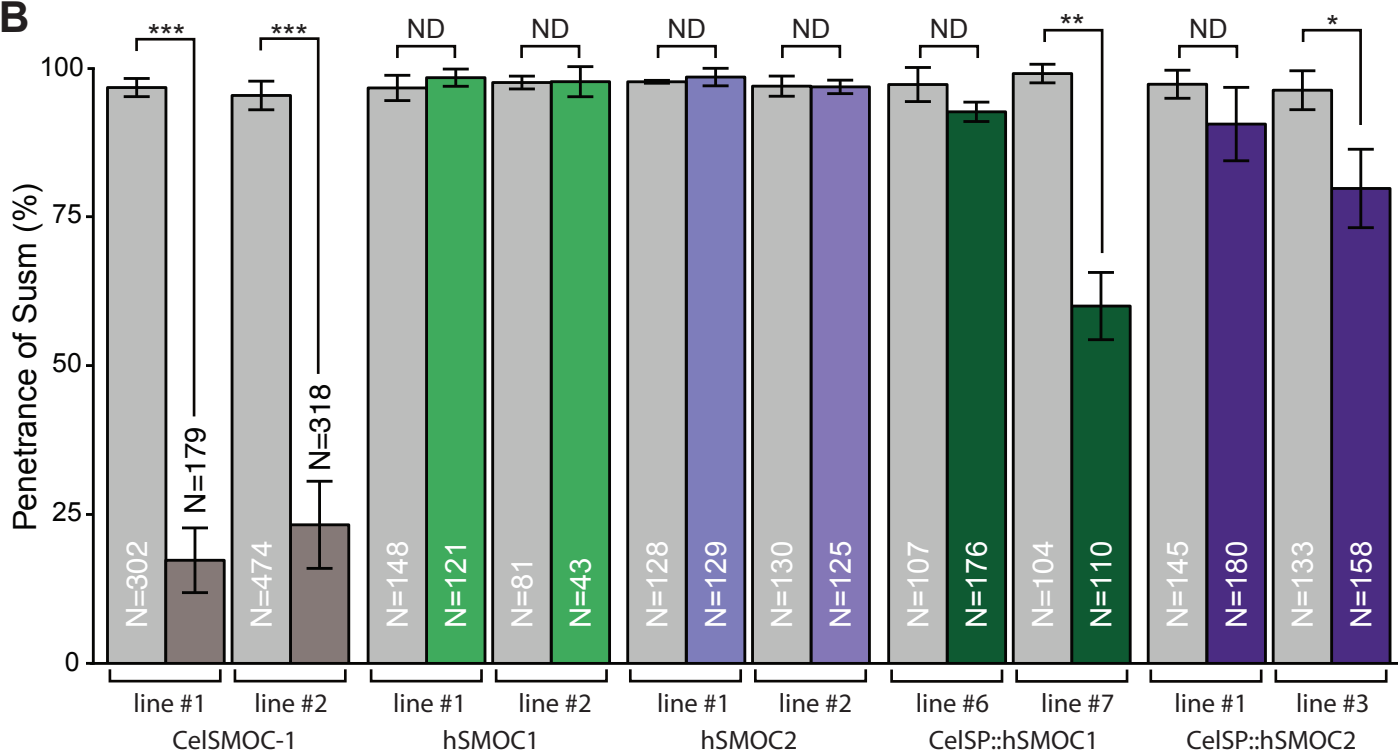**C**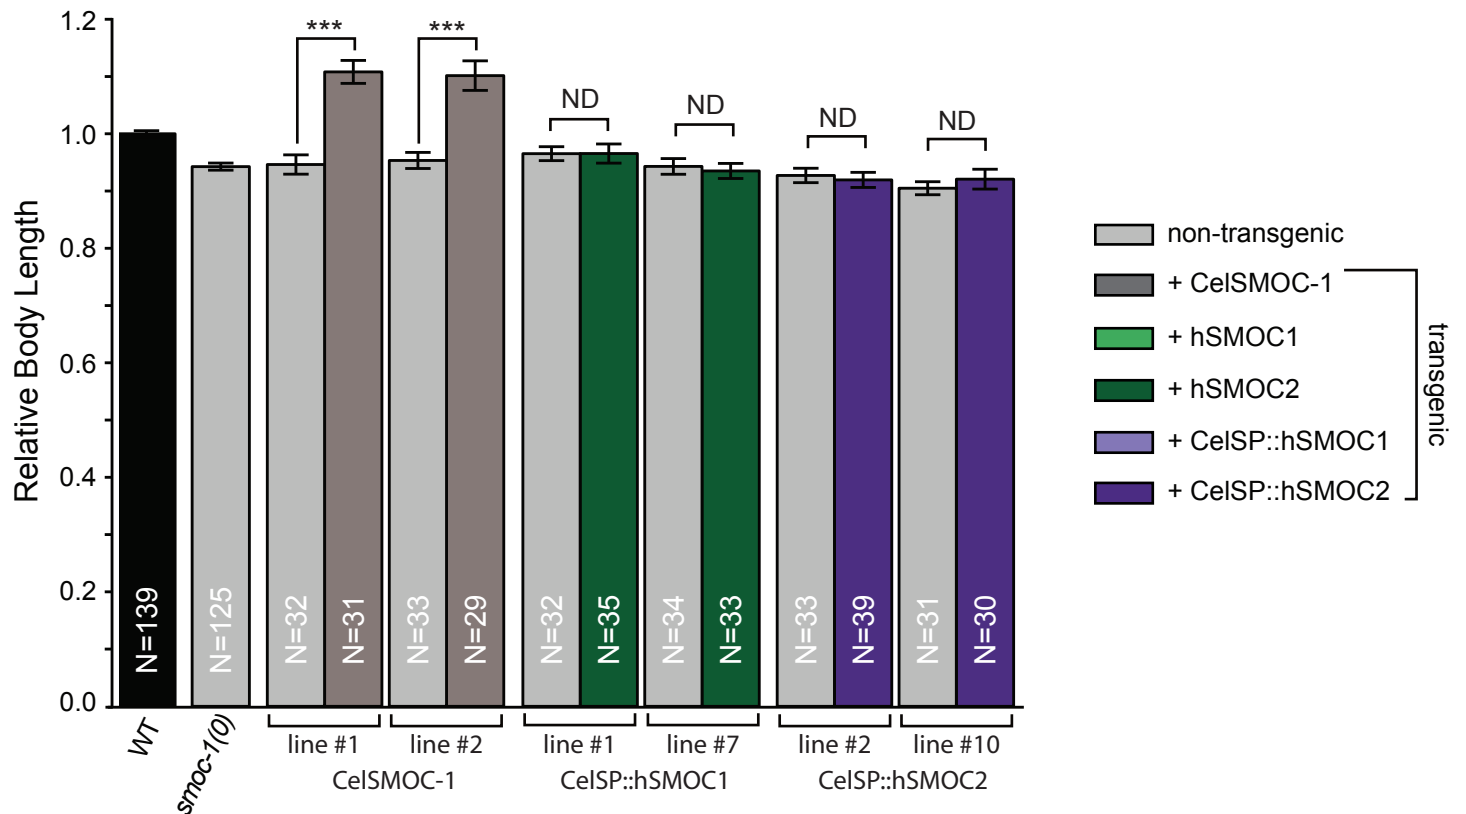

# A model for SMOC-1 function in the BMP pathway

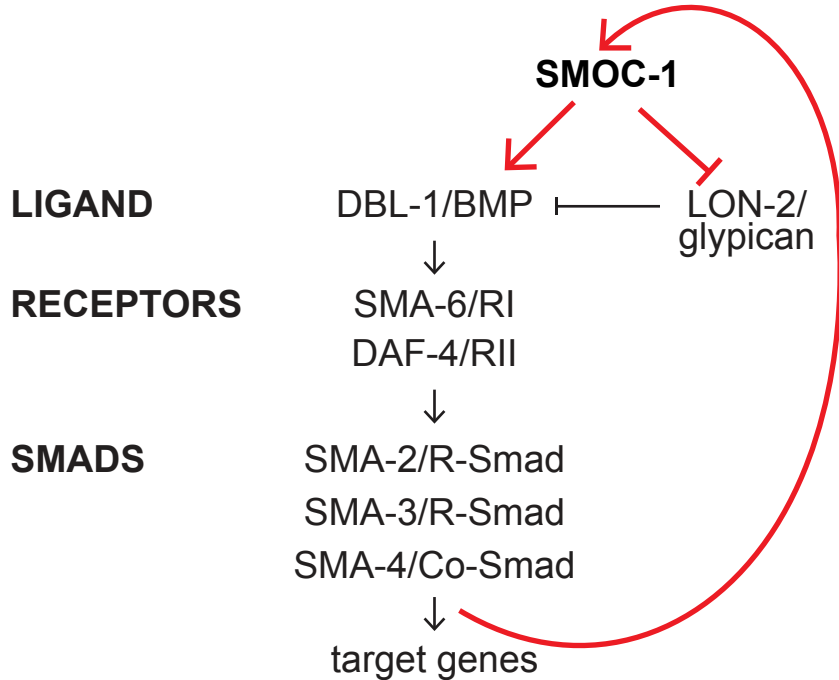

Source: http://biorxiv.org/content/10.1101/416669v1.full.pdf
